# Supplementary material
Source: publisher figshare collection journal article supplement (https://gsapubs.figshare.com/ndownloader/files/23320100)
Supplement: Supplementary file 1 [file 23320100]

## Sheet: Sheet1
Table DR1. U-Pb geochronologic analyses of Upper Bisbee Group, Mancos, and Dakota sandstones, New Mexico and Arizona.
							Isotope ratios						Apparent ages (Ma)
Analysis	U	206Pb	U/Th	206Pb*	±	207Pb*	±	206Pb*	±	error	206Pb*	±	207Pb*	±	206Pb*	±	Best age	±	Conc	Uncertainty
	(ppm)	204Pb		207Pb*	(%)	235U*	(%)	238U	(%)	corr.	238U*	(Ma)	235U	(Ma)	207Pb*	(Ma)	(Ma)	(Ma)	(%)	(%)
11BQ01-13	205.455	11796	2.84026	22.8716	14.6681	0.0933984	14.8344	0.015493	2.21528	0.149334	99.1082	2.17873	90.6642	12.8672			99.1082	2.17873	NA	2.19834	FILTERS
11BQ01-21	94.8026	3227.58	1.27705	18.0213	24.499	0.119125	24.7603	0.0155699	3.58774	0.144899	99.5969	3.54581	114.278	26.7677			99.5969	3.54581	NA	3.56016	Discordance	0.1
11BQ01-32	546.966	18306.3	2.42307	22.0782	8.72061	0.0988769	8.817	0.0158328	1.30014	0.147459	101.265	1.3063	95.7391	8.05574			101.265	1.3063	NA	1.28999	Reverse Disc	0.05
11BQ01-20	277.444	18654.6	0.804196	21.3209	14.2543	0.102724	14.46	0.0158846	2.43007	0.168055	101.594	2.44944	99.2874	13.6782			101.594	2.44944	NA	2.41102	Uncertainty	0.1
11BQ01-85	1309.39	43961	2.44218	20.8968	3.04238	0.104837	5.86138	0.0158889	5.00996	0.854741	101.621	5.05126	101.232	5.64743			101.621	5.05126	NA	4.97068	6/7 ages only over 500 Ma
11BQ01-98	84.5045	9474.8	0.607116	17.7179	23.1454	0.124588	23.4646	0.0160099	3.85722	0.164384	102.389	3.91817	119.223	26.4013			102.389	3.91817	NA	3.82675	6/7 = best age >900 Ma
11BQ01-73	1003.55	43563.7	1.26337	20.8891	3.15396	0.105939	3.53932	0.0160499	1.60601	0.453763	102.643	1.6354	102.243	3.4425			102.643	1.6354	NA	1.59329
11BQ01-28	433.494	12572.4	2.30329	20.3185	4.01519	0.10954	4.98451	0.0161422	2.95356	0.592549	103.228	3.02463	105.544	4.99671			103.228	3.02463	NA	2.93004
11BQ01-17	670.408	50913.2	1.84593	21.1532	4.35869	0.114808	4.61321	0.0176135	1.51113	0.327567	112.555	1.6861	110.354	4.82399			112.555	1.6861	NA	1.49802
11BQ01-80	481.245	14586.2	1.76338	20.7979	6.87826	0.118499	7.07934	0.0178744	1.67527	0.236642	114.208	1.89644	113.71	7.6157			114.208	1.89644	NA	1.66051
11BQ01-31	400.83	29512.1	1.16965	20.9219	5.77992	0.168719	5.97625	0.0256015	1.51924	0.254212	162.961	2.44473	158.307	8.76041			162.961	2.44473	NA	1.5002
11BQ01-82	430.681	51124.4	2.43503	20.8262	7.16727	0.17114	7.31935	0.02585	1.48425	0.202785	164.522	2.41103	160.408	10.8608			164.522	2.41103	NA	1.46547
11BQ01-36	276.452	14835	1.75853	20.3033	4.34458	0.228995	5.2463	0.0337203	2.9408	0.560546	213.79	6.18403	209.369	9.92598			213.79	6.18403	NA	2.89257
11BQ01-47	164.054	18374.5	1.70763	20.4018	11.4509	0.233342	11.5919	0.034527	1.80202	0.155456	218.819	3.877	212.954	22.2721			218.819	3.877	NA	1.77178
11BQ01-01	655.826	82218.7	1.99372	19.9163	1.37718	0.244591	1.71318	0.0353304	1.01899	0.594795	223.823	2.24159	222.173	3.41859			223.823	2.24159	NA	1.0015
11BQ01-24	245.589	17925.5	2.16125	19.7665	3.93808	0.247353	4.13885	0.0354606	1.27343	0.307678	224.634	2.8113	224.424	8.33388			224.634	2.8113	NA	1.2515
11BQ01-46	143.534	5822.98	0.819838	18.7215	8.22096	0.262685	8.37009	0.0356676	1.57298	0.187928	225.923	3.49216	236.828	17.6825			225.923	3.49216	NA	1.54573
11BQ01-97	529.347	30373.9	2.29674	18.9904	1.96947	0.319596	2.34742	0.0440183	1.27733	0.544142	277.692	3.47173	281.591	5.77278			277.692	3.47173	NA	1.25021
11BQ01-34	705.164	98605.9	0.653435	19.2267	1.03365	0.347394	1.40454	0.0484424	0.950936	0.677046	304.952	2.83237	302.759	3.67699			304.952	2.83237	NA	0.928794
11BQ01-45	388.285	49659.6	1.27276	18.7093	1.92032	0.384845	2.07362	0.0522207	0.782473	0.377346	328.141	2.50336	330.597	5.85126			328.141	2.50336	NA	0.762892
11BQ01-44	371.563	11272	0.687431	18.3294	4.407	0.404497	6.0914	0.0537727	4.20518	0.690347	337.642	13.8331	344.904	17.815			337.642	13.8331	NA	4.09695
11BQ01-02	160.697	18469.4	0.382921	18.4759	7.05221	0.419778	7.22389	0.0562502	1.56557	0.216721	352.78	5.37463	355.892	21.6903			352.78	5.37463	NA	1.5235
11BQ01-95B	291.007	49579.5	0.527989	18.5597	4.49854	0.442122	4.60955	0.059513	1.00552	0.218138	372.663	3.64094	371.748	14.3502			372.663	3.64094	NA	0.977005
11BQ01-65	645.067	79029.8	5.60068	18.5841	1.17141	0.445868	1.77351	0.0600961	1.33159	0.750821	376.21	4.86619	374.381	5.55322			376.21	4.86619	NA	1.29348
11BQ01-63	454.715	101696	71.0784	18.0328	1.85148	0.486824	2.44987	0.0636697	1.60434	0.654868	397.905	6.19074	402.744	8.14508			397.905	6.19074	NA	1.55583
11BQ01-76	555.968	80422	0.856995	18.2265	1.19441	0.494585	1.49733	0.0653797	0.902995	0.603069	408.26	3.57225	408.03	5.03121			408.26	3.57225	100.381	0.874996
11BQ01-07	431.333	74811.7	2.05347	18.2922	2.58684	0.499753	2.77301	0.0663011	0.99893	0.360233	413.833	4.004	411.535	9.38274			413.833	4.004	103.809	0.967542
11BQ01-52	270.662	126655	1.64249	18.2228	2.43581	0.508118	2.97426	0.067155	1.70677	0.573845	418.993	6.92378	417.183	10.1754			418.993	6.92378	102.905	1.65248
11BQ01-39	479.778	85367.1	1.9635	17.9852	1.7584	0.531295	2.63255	0.0693027	1.95917	0.744211	431.954	8.18541	432.669	9.2746			431.954	8.18541	98.9684	1.89497
11BQ01-74	468.596	66019.1	2.29558	17.7373	2.09746	0.557131	5.2297	0.071671	4.79067	0.916049	446.215	20.6537	449.658	19.0016			446.215	20.6537	95.4878	4.62864
11BQ01-41	127.89	25866.1	1.19707	17.9816	4.89116	0.55958	5.9703	0.0729775	3.42361	0.57344	454.069	15.0107	451.253	21.7544			454.069	15.0107	103.928	3.30582
11BQ01-37	119.73	20200.3	1.08866	17.6887	5.82942	0.57463	6.08191	0.0737197	1.73423	0.285146	458.527	7.6757	461.005	22.5399			458.527	7.6757	96.8599	1.67399
11BQ01-72	250.595	45459	1.42247	17.8002	2.10675	0.577224	2.73714	0.074519	1.74744	0.638418	463.324	7.8122	462.676	10.1717			463.324	7.8122	100.843	1.68612
11BQ01-16	233.613	9060.13	0.726462	14.1722	1.07127	1.48257	1.61633	0.152388	1.21034	0.748818	914.336	10.3176	923.281	9.8014	944.69	21.934	944.69	21.934	96.7869	2.32182
11BQ01-83	104.405	34137.3	0.817458	14.0712	2.3466	1.59014	2.45255	0.16228	0.713075	0.290748	969.435	6.41813	966.35	15.2895	959.319	47.9603	959.319	47.9603	101.055	4.99941
11BQ01-67	118.267	43961.5	2.46667	14.0257	1.05861	1.64135	1.37297	0.166965	0.874284	0.636785	995.365	8.06376	986.232	8.66315	965.98	21.6305	965.98	21.6305	103.042	2.23923
11BQ01-50	112.716	42271.3	2.55206	13.8525	0.779563	1.67443	0.951013	0.168226	0.544709	0.572767	1002.33	5.05649	998.867	6.04584	991.278	15.8459	991.278	15.8459	101.115	1.59853
11BQ01-56	128.928	55709.8	2.39222	13.7735	2.21524	1.7014	2.53156	0.169961	1.22535	0.484031	1011.9	11.4752	1009.06	16.1909	1002.88	44.9926	1002.88	44.9926	100.9	4.48636
11BQ01-71	172.546	71614	2.18204	13.6316	0.836393	1.75724	2.06482	0.173731	1.88783	0.914286	1032.63	18.0132	1029.83	13.3627	1023.87	16.925	1023.87	16.925	100.856	1.65304
11BQ01-68	54.7876	20720.8	3.71738	13.5928	3.59178	1.73194	4.05673	0.170742	1.88579	0.464854	1016.2	17.7293	1020.47	26.1194	1029.64	72.6433	1029.64	72.6433	98.6947	7.05524
11BQ01-69	96.5731	40663.6	2.72406	13.5324	1.44318	1.79869	1.8957	0.176534	1.22919	0.64841	1048.01	11.8895	1044.98	12.3715	1038.64	29.158	1038.64	29.158	100.903	2.80734
11BQ01-96	287.642	659063	4.25469	13.5318	0.88846	1.77848	1.164	0.174544	0.752021	0.646066	1037.1	7.20415	1037.62	7.56541	1038.72	17.9562	1038.72	17.9562	99.844	1.72869
11BQ01-11	82.287	45472	2.80035	13.3866	3.4405	1.85821	3.59198	0.180412	1.03212	0.287341	1069.22	10.1691	1066.35	23.7161	1060.5	69.2589	1060.5	69.2589	100.822	6.53076
11BQ01-29	204.714	258797	2.73968	13.379	1.38236	1.83365	1.60522	0.177926	0.815974	0.508325	1055.63	7.9454	1057.59	10.5475	1061.64	27.833	1061.64	27.833	99.4337	2.62169
11BQ01-62	147.663	60716.7	2.72468	13.3759	1.82422	1.79581	1.93332	0.174214	0.640277	0.33118	1035.29	6.12383	1043.94	12.6099	1062.11	36.7129	1062.11	36.7129	97.475	3.45661
11BQ01-84	302.364	200709	1.59283	13.3183	0.546136	1.84912	1.72985	0.178613	1.64138	0.948855	1059.39	16.035	1063.12	11.4002	1070.78	10.9731	1070.78	10.9731	98.9363	1.02478
11BQ01-79	117.909	58908.2	1.36477	13.2498	2.41959	1.96427	2.94446	0.18876	1.67793	0.56986	1114.65	17.1755	1103.35	19.8141	1081.1	48.5642	1081.1	48.5642	103.103	4.49209
11BQ01-65	50.4219	23565.5	1.13798	13.2231	3.30687	1.86679	3.46498	0.179031	1.03475	0.298631	1061.68	10.1288	1069.4	22.9142	1085.17	66.3188	1085.17	66.3188	97.8354	6.11137
11BQ01-61	34.0788	27122.3	1.25349	13.0361	6.13236	1.83055	6.32139	0.173072	1.53435	0.242723	1029.02	14.593	1056.48	41.5332	1113.64	122.55	1113.64	122.55	92.4009	11.0044
11BQ01-93	225.845	58448.3	1.32213	13.0191	0.780256	1.87915	1.7315	0.177436	1.54574	0.892714	1052.95	15.0162	1073.76	11.4754	1116.28	15.5737	1116.28	15.5737	94.3271	1.39515
11BQ01-10	54.7807	55019.4	1.85976	12.9807	3.85461	1.85667	4.07422	0.174796	1.31955	0.323878	1038.48	12.6565	1065.8	26.8937	1122.14	76.8669	1122.14	76.8669	92.5451	6.85005
11BQ01-08	129.017	62016.6	5.54071	12.8309	1.32413	2.04137	1.46761	0.189966	0.63291	0.431251	1121.19	6.51331	1129.42	10.0025	1145.29	26.313	1145.29	26.313	97.8961	2.29751
11BQ01-59	82.9254	40952	1.65799	12.7172	1.71135	2.14857	1.95962	0.19817	0.954658	0.487165	1165.48	10.1786	1164.59	13.5789	1162.91	33.9281	1162.91	33.9281	100.221	2.91751
11BQ01-75	393.498	177326	2.86073	12.7072	0.469753	2.122	0.997186	0.195566	0.879609	0.882091	1151.46	9.27531	1155.99	6.88216	1164.47	9.32673	1164.47	9.32673	98.8829	0.800945
11BQ01-14	1387.77	856941	4.12191	12.6315	0.120342	2.19784	0.780754	0.201348	0.771423	0.98805	1182.56	8.33471	1180.36	5.44863	1176.34	2.38096	1176.34	2.38096	100.529	0.202404
11BQ01-12	624.837	27800.4	15.7353	12.6313	0.258619	2.01335	0.92095	0.184445	0.883892	0.959761	1091.21	8.87296	1120.02	6.248	1176.37	5.11594	1176.37	5.11594	92.7612	0.434894
11BQ01-40	136.782	50803.2	3.08486	12.5869	1.68221	2.1865	2.05531	0.199603	1.18087	0.574548	1173.19	12.6664	1176.75	14.3209	1183.32	33.2613	1183.32	33.2613	99.1435	2.81084
11BQ01-33	236.733	67676.7	2.43581	12.4964	0.686307	2.24041	2.08458	0.203053	1.96836	0.94425	1191.7	21.4166	1193.78	14.6354	1197.58	13.5262	1197.58	13.5262	99.509	1.12946
11BQ01-23	212.524	13303	2.53077	12.347	2.37586	2.23729	2.67828	0.200347	1.23632	0.461609	1177.18	13.3023	1192.81	18.7965	1221.23	46.6815	1221.23	46.6815	96.3938	3.82252
11BQ01-99	45.6274	63361.1	2.08615	12.3361	1.71742	2.21124	2.28431	0.19784	1.50617	0.659353	1163.7	16.0364	1184.6	15.9729	1222.95	33.7466	1222.95	33.7466	95.1556	2.75944
11BQ01-94	152.158	63418.1	2.57537	12.3221	1.21482	2.34791	1.67436	0.209829	1.15226	0.688179	1227.91	12.8828	1226.93	11.9236	1225.18	23.8633	1225.18	23.8633	100.223	1.94774
11BQ01-06	25.3391	14792.5	1.44595	12.2797	7.45814	2.16594	7.58209	0.192901	1.36536	0.180077	1137.07	14.233	1170.18	52.7172	1231.98	146.543	1231.98	146.543	92.2964	11.8949
11BQ01-43	61.0511	17054.7	2.04924	11.7441	2.43508	2.77674	2.61713	0.236512	0.959033	0.366445	1368.54	11.8251	1349.3	19.5401	1318.93	47.1957	1318.93	47.1957	103.761	3.57835
11BQ01-22	137.256	148291	2.4194	11.6605	1.02158	2.73991	1.29709	0.231714	0.799256	0.616191	1343.48	9.69275	1339.35	9.64914	1332.75	19.7624	1332.75	19.7624	100.805	1.48282
11BQ01-64	175.644	93951.1	1.06254	11.2717	1.18108	2.65552	6.66956	0.21709	6.56415	0.984195	1266.48	75.4802	1316.18	49.2343	1398.05	22.6415	1398.05	22.6415	90.5889	1.61951
11BQ01-81	321.165	42707.3	2.4134	11.0945	0.255227	2.89584	1.04388	0.233012	1.0122	0.96965	1350.27	12.3309	1380.83	7.87882	1428.37	4.87246	1428.37	4.87246	94.5318	0.341119
11BQ01-57	622.72	783724	3.83032	10.9615	0.256594	3.16554	1.07391	0.251662	1.04281	0.971036	1447.04	13.5162	1448.79	8.28676	1451.35	4.88338	1451.35	4.88338	99.7032	0.336471
11BQ01-05	30.604	12715	2.38532	10.935	3.01334	3.1658	3.27908	0.251073	1.29311	0.394351	1444.01	16.7291	1448.86	25.308	1455.97	57.3254	1455.97	57.3254	99.1787	3.93728
11BQ01-03	441.853	504894	1.72195	10.8429	0.338103	3.21798	0.869752	0.253062	0.801346	0.92135	1454.25	10.4326	1461.5	6.73769	1472.04	6.41674	1472.04	6.41674	98.7915	0.435909
11BQ01-54	258.014	130441	3.29645	10.815	0.337448	3.33714	1.34352	0.261757	1.30046	0.967944	1498.82	17.3915	1489.78	10.4969	1476.92	6.40012	1476.92	6.40012	101.483	0.433341
11BQ01-49	135.475	109735	3.6749	10.6088	1.19041	3.47546	2.04643	0.267409	1.66457	0.813402	1527.64	22.6403	1521.66	16.1376	1513.34	22.4674	1513.34	22.4674	100.944	1.48462
11BQ01-42	110.588	79374.3	1.63371	10.0972	0.671699	3.82995	1.87865	0.280474	1.75446	0.933896	1593.75	24.7734	1599.06	15.1272	1606.06	12.5246	1606.06	12.5246	99.2336	0.779834
11BQ01-48	69.0256	63542.3	1.23727	9.93256	1.18584	4.1445	1.78951	0.29856	1.3402	0.748921	1684.16	19.8637	1663.12	14.6394	1636.64	22.0231	1636.64	22.0231	102.904	1.34563
11BQ01-92	98.5283	200869	0.984006	9.85972	0.948916	4.14496	1.57088	0.296404	1.25189	0.796934	1673.45	18.4514	1663.22	12.8509	1650.3	17.5915	1650.3	17.5915	101.403	1.06596
11BQ01-35	295.303	216770	2.50796	9.6177	0.327432	4.34106	1.06472	0.302807	1.01312	0.951539	1705.21	15.1798	1701.2	8.78707	1696.24	6.03517	1696.24	6.03517	100.529	0.355797
11BQ01-77	317.484	40852.1	1.87866	9.40487	0.292943	4.28546	1.75337	0.292314	1.72872	0.985944	1653.08	25.2073	1690.57	14.436	1737.38	5.36983	1737.38	5.36983	95.1481	0.309077
11BQ01-78	66.9327	70157.7	1.00157	9.40201	1.01611	4.55291	1.35016	0.310462	0.889078	0.658498	1742.98	13.5782	1740.69	11.2409	1737.93	18.6296	1737.93	18.6296	100.29	1.07194
11BQ01-38	294.306	290113	3.84668	9.35427	0.345404	4.70827	2.39243	0.319426	2.36736	0.989523	1786.92	36.9465	1768.71	20.0393	1747.26	6.32406	1747.26	6.32406	102.27	0.361942
11BQ01-91	546.885	259545	3.73647	9.14201	0.328657	4.83065	1.16817	0.320292	1.12098	0.959607	1791.15	17.5305	1790.25	9.82737	1789.18	5.98794	1789.18	5.98794	100.11	0.334675
11BQ01-25	165.597	662681	3.44768	9.13428	0.507819	4.93285	0.902081	0.326792	0.745567	0.826497	1822.81	11.8379	1807.89	7.61585	1790.72	9.25044	1790.72	9.25044	101.792	0.516576
11BQ01-09	230.236	33693.3	2.60574	8.91763	0.871441	5.10964	1.28538	0.330475	0.944872	0.735094	1840.68	15.1295	1837.71	10.9157	1834.33	15.7898	1834.33	15.7898	100.347	0.860798
11BQ01-15	50.7112	38945.6	0.87748	8.64972	1.24992	5.52336	2.13512	0.346501	1.73102	0.810736	1917.87	28.7157	1904.24	18.3582	1889.41	22.4962	1889.41	22.4962	101.506	1.19065
11BQ01-30	125.157	129316	1.25613	8.2286	0.265611	5.88627	1.72366	0.351289	1.70307	0.988056	1940.75	28.541	1959.21	14.9613	1978.75	4.73051	1978.75	4.73051	98.0795	0.239065
11BQ01-55	316.637	149040	1.21246	7.68215	0.200437	6.75167	1.4075	0.376177	1.39316	0.989808	2058.4	24.5493	2079.41	12.4485	2100.27	3.52039	2100.27	3.52039	98.0066	0.167616
11BQ01-87	109.756	137648	1.41561	7.31023	0.549881	7.46323	1.49174	0.395691	1.3867	0.929581	2149.17	25.3436	2168.59	13.3579	2186.99	9.56308	2186.99	9.56308	98.2704	0.43727
11BQ01-86	217.799	239711	39.3586	5.08983	1.48352	14.3501	4.65994	0.529733	4.41749	0.947972	2740.33	98.6209	2773.14	44.2618	2797.08	24.2776	2797.08	24.2776	97.9708	0.867963
11BQ17-37	118.896	3589.94	1.89672	37.1365	38.2364	0.0576779	39.1381	0.0155349	8.3531	0.213426	99.3746	8.23721	56.9384	21.6746			99.3746	8.23721	NA	8.28905
11BQ17-14	114.276	5985.54	2.20464	19.6853	33.6538	0.109373	33.8817	0.0156154	3.92397	0.115814	99.8852	3.88925	105.392	33.9305			99.8852	3.88925	NA	3.89372
11BQ17-29	363.609	17256.7	3.79357	20.308	12.7914	0.106393	12.9472	0.0156703	2.00251	0.154667	100.234	1.99167	102.66	12.6425			100.234	1.99167	NA	1.98702
11BQ17-03	334.869	18893.2	3.93276	21.1312	9.41469	0.102425	9.62575	0.0156974	2.00468	0.208262	100.406	1.99722	99.0123	9.08098			100.406	1.99722	NA	1.98914
11BQ17-04	898.872	18178.9	2.73511	20.3231	2.44021	0.10663	2.84833	0.0157169	1.46912	0.515784	100.53	1.46545	102.878	2.78674			100.53	1.46545	NA	1.45773
11BQ17-15	114.609	6810.01	1.18774	21.5593	19.7973	0.100592	20.8777	0.0157289	6.62911	0.317522	100.606	6.61749	97.323	19.3777			100.606	6.61749	NA	6.57765
11BQ17-09	445.678	11067.3	1.78997	22.0568	5.02198	0.0998109	5.15325	0.0159669	1.15574	0.224273	102.116	1.17089	96.6018	4.7487			102.116	1.17089	NA	1.14663
11BQ17-43	599.88	27209.3	1.83912	21.1871	3.97459	0.105397	4.5631	0.0161956	2.24155	0.491235	103.567	2.30296	101.746	4.41775			103.567	2.30296	NA	2.22364
11BQ17-32	284.284	10247.3	2.51153	21.2865	12.2522	0.105404	12.6214	0.0162727	3.03031	0.240094	104.056	3.12791	101.752	12.2206			104.056	3.12791	NA	3.00598
11BQ17-34	892.756	35645.5	3.48768	20.6659	3.94803	0.109114	5.3977	0.0163543	3.68078	0.681918	104.574	3.81809	105.154	5.39194			104.574	3.81809	NA	3.65109
11BQ17-31	2291.02	172451	2.34275	20.7957	2.10397	0.111132	2.2506	0.0167615	0.79909	0.355056	107.156	0.849193	107.001	2.28562			107.156	0.849193	NA	0.792485
11BQ17-07	896.462	4137.01	2.83653	20.3157	7.22882	0.113978	7.5663	0.0167939	2.23451	0.295324	107.361	2.37913	109.598	7.86078			107.361	2.37913	NA	2.216
11BQ17-01	584.285	34555.4	4.10851	21.9326	5.70986	0.106433	5.765	0.0169302	0.795421	0.137974	108.226	0.853664	102.697	5.63097			108.226	0.853664	NA	0.788782
11BQ17-44	96.6957	5579.77	2.2392	26.9464	38.2052	0.0867384	38.5132	0.0169516	4.86093	0.126214	108.361	5.22332	84.4605	31.2222			108.361	5.22332	NA	4.8203
11BQ17-33	513.534	24525	2.01951	20.0369	7.09651	0.11844	7.26367	0.0172118	1.54934	0.2133	110.01	1.68997	113.657	7.81051			110.01	1.68997	NA	1.53619
11BQ17-40	174.459	10296.6	0.466298	20.0892	12.4815	0.167866	12.8917	0.0244582	3.22646	0.250273	155.771	4.96564	157.566	18.8175			155.771	4.96564	NA	3.18779
11BQ17-35	1557.59	63898.4	0.564695	20.2519	1.24984	0.171937	1.62439	0.0252542	1.03755	0.638736	160.777	1.64752	161.098	2.41983			160.777	1.64752	NA	1.02472
11BQ17-06	179.318	7181.83	0.846213	21.4919	11.2151	0.163305	11.5262	0.0254549	2.65959	0.230743	162.039	4.25586	153.592	16.4308			162.039	4.25586	NA	2.62644
11BQ17-18	409.609	20789.4	0.918105	20.7957	6.29118	0.170759	7.0227	0.0257547	3.1208	0.444388	163.924	5.05124	160.077	10.4008			163.924	5.05124	NA	3.08146
11BQ17-48	663.668	43441.9	0.81524	20.3306	2.84391	0.17471	3.79005	0.0257613	2.50533	0.661028	163.965	4.05606	163.499	5.72358			163.965	4.05606	NA	2.47374
11BQ17-19	586.111	7951.76	1.29191	19.2991	4.34598	0.184821	4.62326	0.0258694	1.57702	0.341106	164.645	2.5636	172.2	7.32291			164.645	2.5636	NA	1.55705
11BQ17-11	526.03	26706	1.18612	20.1004	5.40057	0.179267	5.57682	0.0261339	1.39098	0.249421	166.306	2.2837	167.43	8.60826			166.306	2.2837	NA	1.37319
11BQ17-23	469.522	24437.4	1.38326	19.8569	4.73106	0.18197	5.17751	0.0262065	2.10326	0.406229	166.763	3.46247	169.754	8.09382			166.763	3.46247	NA	2.07629
11BQ17-38	130.101	8222.97	0.660968	21.5526	10.4172	0.168184	10.7462	0.0262896	2.63845	0.245524	167.284	4.35693	157.842	15.7106			167.284	4.35693	NA	2.60451
11BQ17-10	163.524	8162.64	1.29096	20.2402	11.3993	0.179316	11.6542	0.0263228	2.4241	0.208002	167.493	4.0079	167.472	17.9948			167.493	4.0079	NA	2.39288
11BQ17-27	560.092	12209.5	0.486566	19.7534	2.37312	0.183815	3.199	0.0263344	2.1452	0.670585	167.565	3.5483	171.338	5.04366			167.565	3.5483	NA	2.11756
11BQ17-12	206.543	15251.7	1.16289	21.2501	8.87851	0.171012	10.1857	0.0263564	4.99202	0.490101	167.704	8.26386	160.297	15.1049			167.704	8.26386	NA	4.92765
11BQ17-25	504.129	31386.9	0.693615	20.1459	3.99826	0.18358	4.30082	0.0268233	1.5846	0.368441	170.636	2.66842	171.137	6.77354			170.636	2.66842	NA	1.56381
11BQ17-24	489.049	38517.6	3.93538	19.9168	2.49973	0.274755	2.78358	0.0396885	1.22462	0.439943	250.902	3.01356	246.488	6.09197			250.902	3.01356	NA	1.20109
11BQ17-08	375.14	31180.1	2.69123	19.3198	2.62771	0.303871	2.9968	0.0425784	1.44081	0.480782	268.795	3.79319	269.419	7.09167			268.795	3.79319	NA	1.41118
11BQ17-17	96.0514	12744.6	2.31479	19.57	14.4136	0.302816	15.0819	0.0429802	4.43974	0.294376	271.279	11.7942	268.597	35.6089			271.279	11.7942	NA	4.34763
11BQ17-16	612.736	88506.1	1.60679	19.7722	2.08519	0.30481	2.28584	0.04371	0.936526	0.409707	275.789	2.52836	270.15	5.42203			275.789	2.52836	NA	0.916775
11BQ17-39	58.5129	48611.5	2.05529	12.6673	2.72162	2.20927	3.04094	0.202971	1.35651	0.446083	1191.26	14.7544	1183.98	21.2591	1170.73	53.8732	1170.73	53.8732	101.753	4.60167
11BQ17-13	108.207	88095.1	0.547876	10.6836	1.05919	3.33529	1.82319	0.258434	1.48396	0.813937	1481.82	19.6454	1489.35	14.2431	1500.07	20.0256	1500.07	20.0256	98.7835	1.33498
11BQ17-36	43.0316	24423.3	1.64022	9.72524	1.48661	4.24012	2.04676	0.299073	1.40685	0.687354	1686.71	20.879	1681.82	16.8179	1675.72	27.4704	1675.72	27.4704	100.656	1.63932
11BQ17-50	61.2241	52711.4	1.65328	9.692	1.20336	4.28839	2.26138	0.301444	1.91461	0.846659	1698.47	28.588	1691.14	18.6218	1682.04	22.2175	1682.04	22.2175	100.977	1.32086
11BQ17-20	212.483	171275	2.53775	9.6607	0.490796	4.18972	0.815684	0.293557	0.651505	0.798723	1659.28	9.5311	1672.01	6.68651	1688.01	9.05576	1688.01	9.05576	98.2978	0.536474
11BQ17-42	123.314	134114	1.6085	9.6566	0.51941	4.24585	3.2359	0.297363	3.19394	0.987033	1678.22	47.1931	1682.93	26.5995	1688.8	9.58276	1688.8	9.58276	99.3737	0.567431
11BQ17-47	262.236	194004	2.10663	9.43162	0.43999	4.50325	2.02416	0.308043	1.97576	0.976089	1731.07	29.9948	1731.57	16.8198	1732.16	8.07327	1732.16	8.07327	99.9368	0.46608
11BQ17-22	465.335	117009	3.86227	9.41641	0.17958	4.65989	1.62656	0.318244	1.61661	0.993887	1781.15	25.1588	1760.07	13.5986	1735.13	3.29383	1735.13	3.29383	102.652	0.189832
11BQ17-02	1017.34	238249	1.79087	9.39893	0.0929674	4.54035	1.10717	0.309504	1.10326	0.996468	1738.27	16.8095	1738.39	9.21313	1738.53	1.70446	1738.53	1.70446	99.9847	0.0980404
11BQ17-46	338.278	327257	1.30737	9.3842	0.336175	4.64556	1.53698	0.31618	1.49976	0.975787	1771.05	23.2253	1757.5	12.8425	1741.41	6.15949	1741.41	6.15949	101.702	0.353707
11BQ17-26	437.307	97651.4	3.29897	9.19623	0.256186	4.57446	0.884838	0.305104	0.84694	0.957169	1716.57	12.7636	1744.63	7.3729	1778.4	4.67191	1778.4	4.67191	96.5231	0.262703
11BQ17-28	119.34	135267	2.14166	8.88799	0.773989	5.05744	1.78171	0.326011	1.60481	0.900716	1819.02	25.4349	1829	15.1057	1840.36	14.0118	1840.36	14.0118	98.8406	0.761364
11BQ17-30	160.647	173435	4.38295	4.96529	0.373382	13.5835	1.76836	0.489165	1.72849	0.977455	2567.06	36.6017	2721.12	16.7259	2837.54	6.08515	2837.54	6.08515	90.4677	0.214451
11BQ19-32	376.687	15590.9	2.06041	21.3624	16.2975	0.095938	16.4347	0.0148641	2.11955	0.128968	95.1152	2.00122	93.0199	14.6092			95.1152	2.00122	NA	2.10399
11BQ19-29	247.182	9444.39	2.54088	20.1527	18.5794	0.10241	19.1597	0.0149684	4.67964	0.244244	95.7773	4.44891	98.9986	18.0744			95.7773	4.44891	NA	4.64505
11BQ19-12	271.198	7047.12	2.00914	21.05	11.1676	0.0984027	11.356	0.015023	2.06042	0.181438	96.1244	1.96588	95.3009	10.3304			96.1244	1.96588	NA	2.04514
11BQ19-70	287.02	11504.4	2.05988	23.4416	9.86986	0.0886368	10.2951	0.0150696	2.92846	0.284451	96.42	2.80261	86.2327	8.51145			96.42	2.80261	NA	2.90667
11BQ19-42	236.157	5787.89	1.74464	25.2835	26.6031	0.0823279	26.7415	0.0150967	2.71779	0.101632	96.5925	2.60561	80.3312	20.6568			96.5925	2.60561	NA	2.69753
11BQ19-10	147.903	3319.46	3.17746	31.7485	31.0014	0.0660239	31.3845	0.0152028	4.88909	0.15578	97.2659	4.71972	64.9193	19.7394			97.2659	4.71972	NA	4.85239
11BQ19-14	277.599	27007.7	2.41985	21.8057	12.6629	0.0962029	13.1826	0.0152145	3.66481	0.278004	97.3402	3.54053	93.2653	11.7475			97.3402	3.54053	NA	3.63728
11BQ19-69	432.406	33188.3	3.01986	20.4242	17.5132	0.103268	17.9161	0.0152971	3.77792	0.210868	97.8651	3.66934	99.7888	17.0294			97.8651	3.66934	NA	3.74939
11BQ19-03	247.84	7614.3	2.37037	25.5588	15.9197	0.082641	16.0346	0.0153192	1.91606	0.119496	98.0049	1.86363	80.6249	12.4285			98.0049	1.86363	NA	1.90157
11BQ19-60	153.002	6462.31	2.58774	28.2007	30.4939	0.0750482	30.7065	0.0153497	3.60725	0.117475	98.1985	3.51542	73.4787	21.769			98.1985	3.51542	NA	3.57992
11BQ19-36	194.287	9151.86	2.87988	21.254	15.1532	0.0999006	15.5661	0.0153995	3.56146	0.228796	98.5152	3.48191	96.6846	14.3566			98.5152	3.48191	NA	3.53439
11BQ19-19	207.219	7973.89	2.11226	23.4387	22.1272	0.0911514	23.4634	0.0154951	7.80497	0.332645	99.1219	7.67726	88.5754	19.9046			99.1219	7.67726	NA	7.74528
11BQ19-23	202.471	5117.03	2.26322	23.1817	21.0836	0.0922109	21.2485	0.0155034	2.64256	0.124364	99.1744	2.60069	89.5608	18.2172			99.1744	2.60069	NA	2.62234
11BQ19-11	200.575	4999.45	2.23466	23.8672	24.131	0.0897236	24.6155	0.0155313	4.86001	0.197437	99.3515	4.79147	87.2459	20.5821			99.3515	4.79147	NA	4.82275
11BQ19-41	376.143	12179.2	3.64374	20.3988	6.81464	0.104988	7.27478	0.0155325	2.54619	0.350002	99.3591	2.51047	101.37	7.01838			99.3591	2.51047	NA	2.52667
11BQ19-65	349.918	9889.01	1.90164	21.5219	9.94651	0.0995531	10.8452	0.0155394	4.32276	0.398586	99.4032	4.26401	96.3638	9.97061			99.4032	4.26401	NA	4.28961
11BQ19-07	336.66	13757	2.566	21.7344	8.47145	0.0990245	8.76768	0.0156095	2.25983	0.257745	99.8479	2.239	95.8754	8.02156			99.8479	2.239	NA	2.24242
11BQ19-33	273.187	9339.35	1.74396	23.291	13.3937	0.0924376	13.7856	0.0156147	3.26345	0.236729	99.8813	3.23445	89.7716	11.8448			99.8813	3.23445	NA	3.23829
11BQ19-54	359.416	10863.7	2.25894	21.3507	8.61633	0.101152	9.09397	0.0156633	2.90847	0.319824	100.19	2.89146	97.839	8.48242			100.19	2.89146	NA	2.88599
11BQ19-55	201.342	3870.12	2.30346	22.8402	26.7349	0.0946033	26.9463	0.0156713	3.36836	0.125003	100.24	3.35033	91.7826	23.6514			100.24	3.35033	NA	3.3423
11BQ19-18	244.672	8121.07	2.68359	21.8889	16.4908	0.0987286	17.0802	0.0156735	4.44809	0.260424	100.254	4.4249	95.6021	15.5851			100.254	4.4249	NA	4.41368
11BQ19-21	735.006	26670.2	2.5691	20.9179	5.74801	0.103358	6.2017	0.0156805	2.32842	0.375448	100.299	2.3173	99.8712	5.89893			100.299	2.3173	NA	2.3104
11BQ19-52	171.708	5633.98	2.81598	20.5863	13.7506	0.10503	13.9168	0.0156816	2.14446	0.154092	100.306	2.13437	101.409	13.4318			100.306	2.13437	NA	2.12787
11BQ19-13	425.054	24325.9	2.46602	21.1257	6.21916	0.102349	6.56037	0.0156817	2.08818	0.318302	100.306	2.07836	98.9424	6.18484			100.306	2.07836	NA	2.07202
11BQ19-35	735.971	29448.9	7.82212	21.1298	6.56853	0.102447	6.69498	0.0156998	1.29504	0.193435	100.421	1.29042	99.0328	6.31724			100.421	1.29042	NA	1.28501
11BQ19-02	191.199	4834.27	2.27548	24.5077	14.8083	0.088628	15.1508	0.0157533	3.2037	0.211453	100.761	3.20298	86.2245	12.5251			100.761	3.20298	NA	3.17879
11BQ19-34	262.084	7726.44	3.20285	21.8585	12.2453	0.0994343	12.8991	0.0157636	4.05438	0.314316	100.826	4.05607	96.2541	11.8461			100.826	4.05607	NA	4.02284
11BQ19-16	251.664	12027.2	2.432	21.092	12.1241	0.105214	13.0207	0.016095	4.74811	0.36466	102.929	4.84838	101.578	12.5868			102.929	4.84838	NA	4.71041
11BQ19-64	1217.99	47901.7	2.01124	21.1352	2.83338	0.107336	3.91502	0.0164533	2.70173	0.690093	105.202	2.81919	103.526	3.8533			105.202	2.81919	NA	2.6798
11BQ19-74	348.961	11727.2	0.461584	21.2282	3.94855	0.169095	4.72216	0.0260341	2.58994	0.548464	165.679	4.23631	158.633	6.93518			165.679	4.23631	NA	2.55694
11BQ19-53	299.215	25099.1	1.34089	21.3931	9.72058	0.171408	10.1925	0.0265952	3.06541	0.300752	169.203	5.1193	160.64	15.1448			169.203	5.1193	NA	3.02553
11BQ19-71	202.076	22118.1	1.3957	21.8773	6.04746	0.168997	6.95346	0.0268147	3.43202	0.493571	170.581	5.77762	158.548	10.2073			170.581	5.77762	NA	3.38702
11BQ19-72	130.87	10067.1	1.86593	23.1109	20.1503	0.162972	20.3706	0.0273167	2.98756	0.146661	173.733	5.12106	153.301	28.9931			173.733	5.12106	NA	2.94766
11BQ19-51	343.466	31734.7	3.04782	20.3224	10.1852	0.201306	10.5336	0.0296708	2.68669	0.255059	188.488	4.99075	186.23	17.9247			188.488	4.99075	NA	2.64779
11BQ19-01	258.838	14649.8	2.5987	19.4215	6.18559	0.21078	6.49521	0.02969	1.98148	0.305068	188.608	3.68308	194.207	11.4817			188.608	3.68308	NA	1.95277
11BQ19-06	351.393	14412.9	2.05313	20.6934	6.02657	0.198612	6.47726	0.0298083	2.37389	0.366496	189.348	4.42955	183.951	10.8985			189.348	4.42955	NA	2.33937
11BQ19-46	168.108	10913	3.07938	19.1315	9.56804	0.218206	9.85909	0.0302772	2.37784	0.241183	192.283	4.50467	200.416	17.9332			192.283	4.50467	NA	2.34273
11BQ19-22	126.03	11184.6	1.99113	21.346	9.59438	0.28327	10.5182	0.0438547	4.31047	0.409811	276.682	11.674	253.248	23.5793			276.682	11.674	NA	4.21928
11BQ19-15	109.292	12626.8	1.87885	16.1415	11.4265	0.41292	11.6946	0.0483402	2.48999	0.212917	304.324	7.40154	350.976	34.7164			304.324	7.40154	NA	2.43213
11BQ19-09	260.211	56613.9	0.847756	18.039	4.8213	0.516356	4.9507	0.0675554	1.12451	0.227141	421.411	4.58723	422.714	17.1193			421.411	4.58723	98.0465	1.08854
11BQ19-20	261.617	78827.5	1.12422	16.8281	1.77786	0.752921	3.67876	0.0918931	3.22064	0.875467	566.724	17.4729	569.918	16.0456	582.668	38.6001	566.724	17.4729	97.2635	3.08314
11BQ19-05	402.203	133042	2.51751	16.4753	1.62673	0.827988	2.13521	0.0989367	1.38306	0.647741	608.174	8.02686	612.495	9.82053	628.484	35.0345	608.174	8.02686	96.7684	1.31983
11BQ19-43	83.968	28871.3	1.87576	14.0226	4.2474	1.56774	4.43843	0.159442	1.2881	0.290215	953.674	11.4188	957.534	27.5225	966.393	86.7584	966.393	86.7584	98.6838	8.97755
11BQ19-66	247.559	55503.4	1.14752	13.8156	0.972902	1.66101	1.50086	0.166434	1.14282	0.761446	992.432	10.5119	993.76	9.51281	996.699	19.764	996.699	19.764	99.5719	1.98295
11BQ19-48	132.455	53279.8	12.6043	13.3404	1.02497	1.86494	1.95435	0.18044	1.66401	0.851439	1069.38	16.397	1068.74	12.9183	1067.45	20.5977	1067.45	20.5977	100.181	1.92961
11BQ19-25	625.761	188505	1.41263	13.2608	0.470684	1.86749	0.975523	0.179608	0.85446	0.875899	1064.83	8.38685	1069.64	6.45105	1079.46	9.4376	1079.46	9.4376	98.645	0.874288
11BQ19-28	138.512	58456.9	0.935289	13.2353	2.40554	1.87704	3.57148	0.18018	2.63986	0.739149	1067.96	25.9812	1073.02	23.6638	1083.29	48.2566	1083.29	48.2566	98.5844	4.45462
11BQ19-37	328.579	401958	1.65606	13.1667	0.601153	1.88891	2.81936	0.180379	2.75453	0.977004	1069.05	27.1352	1077.2	18.7201	1093.76	12.0496	1093.76	12.0496	97.7409	1.10167
11BQ19-27	97.6448	130546	2.2938	12.8583	2.23888	2.05168	3.38606	0.191335	2.54024	0.750206	1128.6	26.3	1132.86	23.1191	1141.03	44.5417	1141.03	44.5417	98.9103	3.90363
11BQ19-47	218.9	136406	1.8266	12.7553	0.708382	2.1136	2.50303	0.19553	2.4007	0.959117	1151.26	25.3111	1153.25	17.2543	1156.98	14.0526	1156.98	14.0526	99.5057	1.21459
11BQ19-17	84.379	48640.4	1.93315	11.5532	2.55545	2.70663	2.92294	0.226793	1.41888	0.48543	1317.67	16.9093	1330.28	21.6753	1350.61	49.3186	1350.61	49.3186	97.5609	3.65156
11BQ19-26	566.221	369609	4.04208	10.8756	0.216761	3.23098	1.3345	0.254852	1.31677	0.98672	1463.45	17.2396	1464.62	10.348	1466.31	4.117	1466.31	4.117	99.8053	0.280773
11BQ19-40	48.2035	22930.9	0.960335	10.5707	2.28349	3.34684	2.8483	0.25659	1.70249	0.597721	1472.37	22.4104	1492.05	22.2714	1520.12	43.0644	1520.12	43.0644	96.859	2.83297
11BQ19-08	623.529	372427	4.83951	9.97074	0.173444	3.87308	1.80462	0.280081	1.79627	0.995371	1591.77	25.336	1608.09	14.5646	1629.51	3.22425	1629.51	3.22425	97.6837	0.197866
11BQ19-57	46.7192	40948.6	1.78296	9.88032	1.70357	4.06901	2.3278	0.29158	1.58635	0.681481	1649.42	23.0864	1648.11	18.9754	1646.43	31.5987	1646.43	31.5987	100.182	1.91922
11BQ19-62	143.792	98262.2	2.59507	9.74803	0.934489	4.34795	2.44404	0.307397	2.25833	0.924016	1727.88	34.2296	1702.51	20.1786	1671.39	17.2775	1671.39	17.2775	103.38	1.03372
11BQ19-63	115.055	101608	1.99017	9.72601	0.938601	4.21914	2.8182	0.297617	2.65731	0.942909	1679.48	39.2895	1677.75	23.1367	1675.57	17.3443	1675.57	17.3443	100.233	1.03513
11BQ19-38	1011.58	402710	3.74629	9.69654	0.0880435	4.02385	1.37774	0.282981	1.37493	0.997956	1606.36	19.5495	1639.03	11.2052	1681.18	1.62591	1681.18	1.62591	95.5496	0.0967124
11BQ19-44	257.049	164881	3.06268	9.68965	0.282429	4.34036	1.61742	0.305023	1.59257	0.984636	1716.17	23.9956	1701.06	13.3485	1682.49	5.21479	1682.49	5.21479	102.002	0.309945
11BQ19-45	138.067	58058.8	1.44191	9.683	0.398164	4.33068	1.50724	0.304134	1.4537	0.964477	1711.77	21.8543	1699.22	12.4339	1683.76	7.35055	1683.76	7.35055	101.664	0.436556
11BQ19-24	175.326	119176	1.62973	9.45503	0.42807	4.53819	2.91747	0.311204	2.88589	0.989177	1746.63	44.155	1738	24.2792	1727.62	7.85903	1727.62	7.85903	101.1	0.454906
11BQ19-73	168.595	111131	2.3279	9.39006	0.489406	4.57224	1.1093	0.311383	0.995506	0.897417	1747.51	15.238	1744.22	9.24252	1740.26	8.96916	1740.26	8.96916	100.416	0.51539
11BQ19-68	193.11	144906	3.91728	9.34859	0.578311	4.57081	1.15967	0.309912	1.00518	0.866783	1740.27	15.3306	1743.96	9.66168	1748.37	10.5882	1748.37	10.5882	99.5369	0.605601
11BQ19-61	141.905	130883	7.7932	9.33754	0.537082	4.58663	1.36291	0.310617	1.25262	0.91908	1743.74	19.1376	1746.84	11.3621	1750.54	9.83052	1750.54	9.83052	99.6118	0.561572
11BQ19-59	180.544	129406	3.4341	9.31745	0.619027	4.66997	1.08529	0.315581	0.891442	0.821383	1768.11	13.7849	1761.88	9.07659	1754.48	11.3269	1754.48	11.3269	100.777	0.645601
11BQ19-67	79.4191	52212.3	0.67806	9.1438	0.958622	4.69139	4.29964	0.311119	4.19141	0.974829	1746.21	64.1177	1765.7	36.0021	1788.82	17.4648	1788.82	17.4648	97.618	0.976327
11BQ19-04	96.5716	107546	2.32769	9.12302	0.999347	4.86597	1.45407	0.321964	1.05623	0.726396	1799.31	16.5831	1796.38	12.248	1792.97	18.1975	1792.97	18.1975	100.354	1.01494
11BQ19-75	333.023	225506	4.21773	8.44912	0.306958	5.76999	2.24894	0.353578	2.2279	0.990641	1951.66	37.5163	1941.92	19.4647	1931.53	5.49535	1931.53	5.49535	101.042	0.284508
11BQ19-49	29.7533	26565.2	0.754945	5.47455	0.849478	13.0913	1.41877	0.519794	1.13636	0.800942	2698.3	25.0542	2686.26	13.3844	2677.19	14.0546	2677.19	14.0546	100.789	0.524975
11BQ19-59	35.9549	52408.9	1.63237	5.38286	0.64084	13.3088	1.04647	0.51958	0.8273	0.790562	2697.4	18.2352	2701.81	9.8834	2705.1	10.5776	2705.1	10.5776	99.7153	0.391023
11BQ19-56	80.4901	97847.2	2.118	4.89547	0.394789	15.5654	1.38782	0.552656	1.33048	0.958686	2836.21	30.5289	2850.5	13.2418	2860.61	6.42448	2860.61	6.42448	99.147	0.224584
11BQ19-39	126.957	141955	14.9151	3.67158	1.0624	25.0322	1.45774	0.666577	0.998147	0.684723	3292.65	25.7359	3309.47	14.234	3319.67	16.6401	3319.67	16.6401	99.1859	0.501257
12BQ21-79	401.053	45662.6	1.43739	21.676	7.30491	0.0915394	7.79428	0.0143908	2.71827	0.348752	92.108	2.48594	88.9364	6.63714			92.108	2.48594	NA	2.69894
12BQ21-48	674.71	44963	3.24108	20.4165	2.9959	0.0998797	3.23542	0.0147896	1.2217	0.377602	94.642	1.1478	96.6652	2.98328			94.642	1.1478	NA	1.21278
12BQ21-41	115.679	4011.62	2.16899	22.3018	27.1431	0.0918722	27.5637	0.0148601	4.79661	0.174019	95.0898	4.52761	89.2459	23.5536			95.0898	4.52761	NA	4.7614
12BQ21-78	457.165	51823.7	1.83917	21.0722	6.30627	0.0997046	6.89774	0.0152379	2.79459	0.405146	97.4888	2.70391	96.5037	6.35011			97.4888	2.70391	NA	2.77356
12BQ21-65	371.883	13126.7	1.90685	18.2751	15.9276	0.115593	17.0043	0.015321	5.95459	0.350182	98.0167	5.79235	111.069	17.8919			98.0167	5.79235	NA	5.90955
12BQ21-19	799.806	16007.1	2.65782	20.1936	6.54666	0.106031	6.79352	0.015529	1.81471	0.267124	99.3373	1.78887	102.328	6.61295			99.3373	1.78887	NA	1.8008
12BQ21-27	131.31	6997	1.76421	18.0209	19.0843	0.119098	19.522	0.0155661	4.111	0.210582	99.5728	4.06198	114.254	21.0986			99.5728	4.06198	NA	4.07941
12BQ21-98	565.417	50046.4	2.4261	21.0063	7.23893	0.103983	7.44048	0.0158421	1.72009	0.23118	101.324	1.72924	100.446	7.11604			101.324	1.72924	NA	1.70664
12BQ21-59	1221.65	64679.3	1.15245	21.0125	3.74882	0.104134	4.92479	0.0158697	3.19374	0.648502	101.499	3.21623	100.585	4.71618			101.499	3.21623	NA	3.16873
12BQ21-9	392.505	33277.2	1.07028	21.12	5.39253	0.103738	6.24311	0.0158903	3.14595	0.503908	101.63	3.17217	100.221	5.95813			101.63	3.17217	NA	3.12129
12BQ21-88	215.203	6661.71	2.53685	19.7838	10.7413	0.111776	10.9711	0.0160382	2.2339	0.203617	102.569	2.27315	107.589	11.2003			102.569	2.27315	NA	2.21623
12BQ21-37	477.742	34537.5	2.09631	21.3693	6.11064	0.103626	6.24415	0.0160604	1.28434	0.205687	102.709	1.30868	100.117	5.95324			102.709	1.30868	NA	1.27416
12BQ21-36	220.9	6480.66	1.60691	22.167	17.4525	0.100627	18.0109	0.0161779	4.45002	0.247074	103.455	4.56702	97.3554	16.7217			103.455	4.56702	NA	4.4145
12BQ21-80	822.669	20936.5	2.48641	20.405	4.94648	0.109456	5.20308	0.0161985	1.61379	0.31016	103.585	1.65829	105.468	5.21223			103.585	1.65829	NA	1.60089
12BQ21-32	102.604	2282.08	1.9659	17.3046	35.0048	0.131161	35.4738	0.0164613	5.74901	0.162064	105.253	6.00185	125.141	41.7891			105.253	6.00185	NA	5.70234
12BQ21-11	450.028	12212.1	2.61495	20.6321	5.42715	0.111245	5.78342	0.0166464	1.99851	0.345558	106.426	2.10948	107.103	5.87881			106.426	2.10948	NA	1.9821
12BQ21-46	484.03	7271.67	1.40887	19.9625	8.87478	0.119754	9.64174	0.0173381	3.76848	0.390851	110.811	4.14021	114.849	10.4705			110.811	4.14021	NA	3.73628
12BQ21-18	465.658	44560.2	1.97532	20.4898	6.95105	0.117358	7.01802	0.0174401	0.967263	0.137826	111.457	1.06881	112.674	7.48465			111.457	1.06881	NA	0.958949
12BQ21-61	652.397	35415.1	2.1076	20.6401	3.73728	0.116532	4.0567	0.0174444	1.57784	0.388947	111.484	1.74392	111.923	4.29913			111.484	1.74392	NA	1.56427
12BQ21-93	671.903	53325.4	1.21819	20.9749	3.70339	0.115784	4.04595	0.0176135	1.6293	0.402699	112.555	1.81794	111.242	4.26304			112.555	1.81794	NA	1.61516
12BQ21-5	451.382	15723.6	1.07304	18.5983	10.1993	0.165532	14.2298	0.0223282	9.92271	0.69732	142.354	13.9705	155.534	20.5232			142.354	13.9705	NA	9.81397
12BQ21-95	683.685	84521.4	3.40255	20.4474	2.7866	0.156206	4.43187	0.0231651	3.44621	0.777597	147.628	5.02978	147.376	6.07973			147.628	5.02978	NA	3.40705
12BQ21-15	49.0546	6442.52	0.58088	25.3171	48.5001	0.126265	49.2315	0.0231844	8.45502	0.17174	147.75	12.3502	120.736	56.0992			147.75	12.3502	NA	8.35887
12BQ21-84	80.9553	9856.15	0.924896	24.2869	29.3836	0.132314	29.6335	0.0233064	3.8403	0.129593	148.518	5.63835	126.174	35.1742			148.518	5.63835	NA	3.7964
12BQ21-58	589.385	35375.5	1.8492	19.9985	5.08118	0.161999	5.33336	0.0234967	1.62058	0.303858	149.717	2.39834	152.451	7.54996			149.717	2.39834	NA	1.60191
12BQ21-86	171.754	27989	0.333775	19.1403	9.58355	0.169507	9.70219	0.0235307	1.51261	0.155904	149.931	2.2417	158.991	14.2795			149.931	2.2417	NA	1.49515
12BQ21-44	329.067	46413.8	2.70074	20.4388	4.62471	0.160337	4.82562	0.0237677	1.37792	0.285543	151.424	2.06219	150.998	6.77078			151.424	2.06219	NA	1.36186
12BQ21-100	59.9797	8087.03	2.03173	20.2196	17.0486	0.162092	18.0745	0.0237702	6.00266	0.332107	151.439	8.98446	152.533	25.6041			151.439	8.98446	NA	5.9327
12BQ21-69	334.741	26098	1.94913	20.6	6.57086	0.159808	7.00829	0.0238762	2.43718	0.347757	152.107	3.66373	150.535	9.80548			152.107	3.66373	NA	2.40865
12BQ21-26	301.891	28851.8	1.88483	19.8636	4.06521	0.170171	4.78051	0.0245156	2.51542	0.526182	156.132	3.88019	159.568	7.05908			156.132	3.88019	NA	2.4852
12BQ21-34	395.906	41698.8	0.681161	20.5025	5.3496	0.173178	5.52746	0.0257513	1.39089	0.251632	163.902	2.25095	162.173	8.28503			163.902	2.25095	NA	1.37335
12BQ21-83	181.651	20263.4	1.61327	21.1656	7.17779	0.168825	7.75595	0.0259159	2.93838	0.378855	164.936	4.78498	158.398	11.3755			164.936	4.78498	NA	2.90111
12BQ21-73	250.099	26070.8	0.880148	20.5337	5.29591	0.174284	5.72965	0.0259552	2.18683	0.38167	165.183	3.56639	163.13	8.63481			165.183	3.56639	NA	2.15905
12BQ21-81	461.625	53289.5	1.56737	20.2424	2.2755	0.177116	2.5063	0.0260028	1.05054	0.419161	165.483	1.71634	165.576	3.82917			165.483	1.71634	NA	1.03717
12BQ21-545	385.615	30701	1.22105	20.4297	5.34206	0.177466	5.76746	0.0262953	2.17393	0.376931	167.32	3.59062	165.878	8.82659			167.32	3.59062	NA	2.14596
12BQ21-1	473.364	55408.2	0.993763	20.449	2.22106	0.17975	2.65088	0.0266587	1.44708	0.545886	169.602	2.42227	167.845	4.1011			169.602	2.42227	NA	1.42821
12BQ21-99	453.614	140722	1.01954	20.4591	5.00178	0.179869	5.08234	0.0266895	0.901313	0.177342	169.795	1.51041	167.947	7.86726			169.795	1.51041	NA	0.889546
12BQ21-13	1299.43	54434	0.68516	19.7054	1.02321	0.192318	1.65232	0.0274855	1.29738	0.785188	174.792	2.23725	178.605	2.70616			174.792	2.23725	NA	1.27995
12BQ21-47	155.948	9681.85	0.99209	19.5844	13.6927	0.198833	14.0278	0.0282421	3.04796	0.21728	179.537	5.39671	184.139	23.6281			179.537	5.39671	NA	3.00591
12BQ21-39	362.868	64460.8	1.8292	20.4587	2.97924	0.19226	3.49639	0.0285277	1.82999	0.523395	181.327	3.27204	178.556	5.72496			181.327	3.27204	NA	1.80449
12BQ21-7	431.694	38100.8	2.27975	19.6667	2.77353	0.210117	3.20085	0.0299704	1.59782	0.499184	190.363	2.99718	193.651	5.64331			190.363	2.99718	NA	1.57446
12BQ21-12	640.708	68783.4	0.713732	19.6977	2.57147	0.229843	3.12829	0.0328356	1.7815	0.569481	208.271	3.65105	210.069	5.9364			208.271	3.65105	NA	1.75303
12BQ21-91	411.099	81993.7	15.1409	20.0221	2.20006	0.227149	2.53178	0.0329852	1.25287	0.494856	209.205	2.57898	207.842	4.75853			209.205	2.57898	NA	1.23276
12BQ21-75	442.952	61356.9	2.08723	19.7871	1.67113	0.248344	1.92771	0.0356397	0.960948	0.498491	225.749	2.13178	225.23	3.89398			225.749	2.13178	NA	0.944317
12BQ21-38	240.85	6074.44	0.59968	19.6735	10.6102	0.253002	10.7884	0.0360996	1.95263	0.180994	228.611	4.3857	229.011	22.1221			228.611	4.3857	NA	1.91841
12BQ21-21	55.245	13796.9	2.59335	24.2046	18.0329	0.207921	18.111	0.0365002	1.68049	0.0927883	231.103	3.81487	191.807	31.6646			231.103	3.81487	NA	1.65072
12BQ21-43	182.398	18975.2	1.16433	19.6658	5.10616	0.264878	5.34485	0.0377794	1.57944	0.295506	239.054	3.70656	238.59	11.3653			239.054	3.70656	NA	1.55051
12BQ21-25	60.1528	20075.9	1.84375	18.5615	14.1084	0.444902	14.681	0.059893	4.06017	0.27656	374.975	14.7903	373.703	45.9311			374.975	14.7903	NA	3.94435
12BQ21-2	272.293	51795.9	4.7818	18.2931	1.85191	0.488874	2.42368	0.064861	1.56354	0.64511	405.121	6.13929	404.143	8.08078			405.121	6.13929	101.652	1.51542
12BQ21-14	253.135	69538.2	1.96317	18.1669	2.642	0.493597	4.10942	0.0650357	3.14757	0.765939	406.178	12.3903	407.359	13.7904			406.178	12.3903	98.1021	3.05046
12BQ21-66	175.618	56924.4	2.41333	18.1755	2.29473	0.494907	6.59626	0.0652394	6.18424	0.937538	407.411	24.4157	408.249	22.1772			407.411	24.4157	98.653	5.9929
12BQ21-90	512.585	95957.1	2.98148	18.1484	1.06846	0.504115	1.37611	0.066354	0.867222	0.630199	414.152	3.47868	414.484	4.6831			414.152	3.47868	99.4815	0.839951
12BQ21-96	347.96	128038	3.02934	17.8209	1.85391	0.584871	2.71622	0.0755943	1.98516	0.730854	469.772	8.99404	467.587	10.1783			469.772	8.99404	102.823	1.91456
12BQ21-77	213.765	122594	2.38053	17.5835	2.07608	0.597048	2.47737	0.07614	1.35176	0.545643	473.042	6.1654	475.359	9.40425			473.042	6.1654	97.221	1.30335
12BQ21-68	119.814	108204	2.36172	16.3977	2.58228	0.829078	3.305	0.0985998	2.06273	0.624124	606.198	11.9343	613.1	15.2124	638.702	55.5723	606.198	11.9343	94.9109	1.96872
12BQ21-33	367.767	130386	3.9787	16.4526	1.393	0.86541	1.83366	0.103265	1.19241	0.650289	633.517	7.19478	633.072	8.63785	631.5	30.0036	633.517	7.19478	100.319	1.13569
12BQ21-40	387.142	144557	3.2554	13.6006	0.458837	1.74124	1.12764	0.171758	1.03007	0.913473	1021.79	9.7334	1023.92	7.2731	1028.47	9.27907	1028.47	9.27907	99.3511	0.902224
12BQ21-94	113.848	93866.6	2.76255	13.3727	1.21933	1.85891	1.38215	0.180293	0.650841	0.470889	1068.57	6.40888	1066.6	9.1255	1062.59	24.5392	1062.59	24.5392	100.563	2.30938
12BQ21-62	155.368	166742	3.18968	13.1974	0.85618	1.91098	1.99644	0.182913	1.80353	0.903374	1082.87	17.9777	1084.93	13.3085	1089.05	17.1375	1089.05	17.1375	99.4325	1.57362
12BQ21-35	42.899	20347.4	2.19953	13.144	4.29879	1.85401	4.58069	0.176741	1.58211	0.345387	1049.15	15.3184	1064.86	30.2235	1097.18	86.0892	1097.18	86.0892	95.6222	7.8464
12BQ21-10	123.278	126667	2.89707	12.7287	0.783489	2.09289	1.81658	0.19321	1.63894	0.902209	1138.74	17.1078	1146.48	12.4821	1161.12	15.5334	1161.12	15.5334	98.0725	1.3378
12BQ21-4	142.932	125124	1.84623	12.5645	1.08453	2.23236	1.70319	0.203428	1.31326	0.771059	1193.71	14.3107	1191.26	11.9442	1186.84	21.4404	1186.84	21.4404	100.578	1.80651
12BQ21-64	160.562	62936.1	1.32087	12.4085	1.2693	2.29144	3.61578	0.206217	3.38566	0.936358	1208.63	37.3135	1209.65	25.565	1211.45	24.9817	1211.45	24.9817	99.7677	2.06213
12BQ21-24	19.9229	21233.9	3.47883	11.6529	6.90569	2.69023	7.12082	0.227365	1.73707	0.243943	1320.67	20.7438	1325.77	52.7578	1334.01	133.72	1334.01	133.72	99.0003	10.0239
12BQ21-51	244.369	83625.7	2.40584	11.1869	0.441329	2.79702	1.45565	0.226936	1.38713	0.952932	1318.42	16.5394	1354.74	10.8882	1412.52	8.44344	1412.52	8.44344	93.3382	0.597757
12BQ21-87	1036.15	387780	0.93946	11.1573	0.191998	3.08417	1.15579	0.249572	1.13973	0.986106	1436.27	14.6742	1428.76	8.86246	1417.59	3.67074	1417.59	3.67074	101.318	0.258943
12BQ21-85	183.841	157866	1.34584	11.1351	0.365886	3.06036	1.41342	0.247154	1.36524	0.965913	1423.78	17.4412	1422.83	10.8175	1421.38	6.99165	1421.38	6.99165	100.169	0.491891
12BQ21-23	366.835	51567.6	3.20802	11.1194	0.376375	2.84244	1.84894	0.22923	1.81023	0.979062	1330.46	21.7616	1366.81	13.8888	1424.09	7.18945	1424.09	7.18945	93.4254	0.504846
12BQ21-74	93.3514	11229.8	1.1931	10.9856	1.56454	2.98376	4.70622	0.23773	4.43855	0.943124	1374.89	54.9577	1403.49	35.8057	1447.18	29.794	1447.18	29.794	95.0044	2.05876
12BQ21-50	326.555	318490	1.86854	10.5019	0.244675	3.51447	1.07648	0.267685	1.04831	0.973827	1529.04	14.2699	1530.47	8.50941	1532.44	4.6064	1532.44	4.6064	99.7784	0.300593
12BQ21-6	164.711	123131	2.2485	9.97304	0.460995	3.83544	1.34741	0.277422	1.2661	0.939651	1578.37	17.7253	1600.21	10.8524	1629.09	8.57022	1629.09	8.57022	96.8866	0.526076
12BQ21-16	88.482	81913.9	1.5329	9.89238	0.888856	4.08623	1.28072	0.293172	0.922053	0.719948	1657.36	13.4754	1651.56	10.4478	1644.17	16.4926	1644.17	16.4926	100.802	1.0031
12BQ21-30	243.899	24037.9	1.75272	9.83366	1.11531	4.04599	4.08807	0.288561	3.93299	0.962065	1634.34	56.7787	1643.49	33.2953	1655.21	20.6637	1655.21	20.6637	98.7391	1.24841
12BQ21-67	63.9688	83624	1.05379	9.76323	1.21884	4.07272	2.39128	0.288388	2.05734	0.86035	1633.47	29.6864	1648.86	19.4965	1668.51	22.5439	1668.51	22.5439	97.8999	1.35114
12BQ21-42	266.21	304426	3.367	9.71549	0.209748	4.2275	0.789798	0.297884	0.761438	0.964091	1680.81	11.2659	1679.38	6.48547	1677.57	3.87522	1677.57	3.87522	100.193	0.231002
12BQ21-8	112.347	156767	1.45151	9.66674	0.618129	4.16754	1.98038	0.292186	1.88145	0.950041	1652.44	27.425	1667.66	16.2186	1686.86	11.4069	1686.86	11.4069	97.9597	0.676222
12BQ21-60	243.652	129450	2.67339	9.65399	0.296214	4.38655	3.26386	0.307135	3.25039	0.995873	1726.59	49.2346	1709.81	26.9945	1689.3	5.46458	1689.3	5.46458	102.208	0.323483
12BQ21-22	534.105	393432	2.26126	9.64828	0.208551	4.23422	1.25287	0.296293	1.23539	0.986048	1672.9	18.2029	1680.68	10.2913	1690.39	3.84683	1690.39	3.84683	98.9657	0.227571
12BQ21-72	83.0699	87927.7	1.73257	9.62441	0.886368	4.19464	1.46258	0.292798	1.1634	0.795443	1655.5	16.9858	1672.97	11.9925	1694.95	16.3387	1694.95	16.3387	97.672	0.963959
12BQ21-31	759.89	522750	2.2433	9.54109	0.527703	4.49789	1.94963	0.311247	1.87685	0.962672	1746.84	28.7192	1730.58	16.1969	1710.96	9.70686	1710.96	9.70686	102.097	0.567333
12BQ21-82	448.124	621179	1.9987	9.44242	0.173047	4.38193	1.63437	0.300087	1.62518	0.994379	1691.74	24.1823	1708.94	13.5124	1730.07	3.17602	1730.07	3.17602	97.7847	0.183578
12BQ21-3	214.671	220730	2.17374	9.36198	0.375073	4.57109	1.04074	0.310374	0.970807	0.932802	1742.55	14.8232	1744.01	8.67089	1745.75	6.86871	1745.75	6.86871	99.8167	0.393454
12BQ21-56	58.1725	70504.6	1.07871	9.20022	0.915312	4.74714	1.6233	0.316759	1.34064	0.825871	1773.88	20.7899	1775.6	13.6155	1777.61	16.6987	1777.61	16.6987	99.7901	0.939388
12BQ21-70	931.541	318468	5.49888	9.09914	0.463878	4.62951	3.10285	0.305516	3.06798	0.988762	1718.6	46.2839	1754.6	25.9149	1797.74	8.44267	1797.74	8.44267	95.5979	0.469627
12BQ21-71	222.603	45707.5	2.30079	5.34392	0.527311	12.4289	2.31683	0.481715	2.25602	0.973755	2534.73	47.2819	2637.36	21.7762	2717.08	8.69379	2717.08	8.69379	93.289	0.319969
12BQ21-49	51.7415	92795.4	2.3519	5.26153	0.532382	13.6736	1.39387	0.521788	1.28819	0.924185	2706.76	28.4736	2727.37	13.1893	2742.66	8.75343	2742.66	8.75343	98.6912	0.319159
12BQ37-91	615.729	9479.16	2.73428	20.3301	4.7035	0.102043	4.82904	0.015046	1.09394	0.226533	96.27	1.04531	98.6603	4.54023			96.27	1.04531	NA	1.08581
12BQ37-86	253.647	10663.4	0.971181	21.967	8.21731	0.0947249	8.40715	0.0150915	1.77653	0.211312	96.5594	1.70262	91.8954	7.38662			96.5594	1.70262	NA	1.76329
12BQ37-95	376.103	17443.7	2.32787	20.8765	6.83337	0.10017	7.13143	0.0151668	2.0402	0.286085	97.0372	1.96493	96.933	6.5931			97.0372	1.96493	NA	2.02492
12BQ37-35	189.508	14611.9	1.35439	22.3603	12.4834	0.093971	12.8833	0.0152395	3.18504	0.247222	97.499	3.08202	91.1958	11.2374			97.499	3.08202	NA	3.16108
12BQ37-16	397.719	19307.8	1.87047	22.2011	8.17458	0.0946757	8.84338	0.0152445	3.37365	0.381489	97.5307	3.26558	91.8497	7.76622			97.5307	3.26558	NA	3.34826
12BQ37-39	182.595	8988.13	1.39463	23.1729	14.8407	0.0909319	15.0107	0.0152825	2.2524	0.150053	97.7723	2.18561	88.3711	12.7049			97.7723	2.18561	NA	2.23541
12BQ37-20	365.607	13713.6	1.81164	21.4696	9.63917	0.0981893	9.79707	0.0152893	1.75185	0.178814	97.8151	1.70064	95.1035	8.89455			97.8151	1.70064	NA	1.73863
12BQ37-92	496.003	20658.4	2.30024	20.2087	4.50144	0.104445	4.81914	0.0153082	1.72079	0.357074	97.9353	1.67252	100.871	4.62749			97.9353	1.67252	NA	1.70778
12BQ37-93	229.943	14085.6	1.06745	20.4471	12.7915	0.103547	13.0475	0.0153556	2.57217	0.197139	98.2363	2.50765	100.045	12.4315			98.2363	2.50765	NA	2.55267
12BQ37-54	853.874	101919	1.41739	20.7575	2.73287	0.10203	3.05439	0.0153603	1.36409	0.446599	98.2662	1.33027	98.6483	2.87137			98.2662	1.33027	NA	1.35375
12BQ37-62	506.452	63358.4	2.14856	21.1079	2.6588	0.100878	3.38608	0.0154432	2.09673	0.619222	98.7923	2.05562	97.586	3.15053			98.7923	2.05562	NA	2.08075
12BQ37-90	228.023	10992.8	1.54863	22.2194	12.009	0.0960178	12.5156	0.0154733	3.52497	0.281645	98.9835	3.46249	93.0938	11.1336			98.9835	3.46249	NA	3.49805
12BQ37-24	626.776	39626.4	1.22906	20.4032	5.07586	0.107023	5.48296	0.0158371	2.07326	0.378129	101.293	2.08365	103.239	5.38233			101.293	2.08365	NA	2.05706
12BQ37-34	281.813	24971.4	0.686778	19.9874	3.65867	0.177665	4.21701	0.0257548	2.09697	0.497265	163.924	3.39411	166.049	6.45983			163.924	3.39411	NA	2.07053
12BQ37-83	554.786	21600	1.15995	19.8243	2.60477	0.179578	2.68489	0.0258196	0.650985	0.242463	164.331	1.05625	167.697	4.15035			164.331	1.05625	NA	0.642757
12BQ37-12	487.943	36524.8	1.17967	20.2864	1.84523	0.177133	2.14561	0.0260617	1.09487	0.510286	165.853	1.79271	165.591	3.27835			165.853	1.79271	NA	1.08091
12BQ37-73	537.685	36299.4	1.30322	20.2959	2.44922	0.177795	2.98136	0.0261714	1.69995	0.570192	166.542	2.79486	166.162	4.5698			166.542	2.79486	NA	1.67818
12BQ37-38	287.101	38217.6	1.25675	20.2112	2.99792	0.226764	3.22945	0.0332403	1.20078	0.37182	210.796	2.49025	207.523	6.06145			210.796	2.49025	NA	1.18135
12BQ37-40	504.648	16937.6	0.587709	19.0931	2.9947	0.242531	5.25005	0.0335847	4.31217	0.821357	212.945	9.03254	220.491	10.4056			212.945	9.03254	NA	4.24173
12BQ37-8	112.601	37093.6	1.59283	19.444	10.9473	0.241639	11.1186	0.0340762	1.94443	0.174881	216.009	4.13057	219.761	21.9745			216.009	4.13057	NA	1.91222
12BQ37-59	272.305	47367.6	0.849407	19.8708	4.98981	0.236904	5.24348	0.0341418	1.61118	0.307272	216.418	3.429	215.882	10.1977			216.418	3.429	NA	1.58443
12BQ37-3	255.659	23779.5	2.55615	18.1293	13.9736	0.261844	15.1109	0.0344289	5.75119	0.380599	218.208	12.3395	236.152	31.8492			218.208	12.3395	NA	5.65495
12BQ37-88	415.202	80166.6	1.37014	19.4516	1.75331	0.246997	2.79007	0.0348454	2.17035	0.777883	220.803	4.71106	224.134	5.61146			220.803	4.71106	NA	2.1336
12BQ37-82	252.86	31653	2.14559	19.6517	3.77075	0.256875	3.97619	0.0366119	1.26154	0.317273	231.798	2.87227	232.146	8.25157			231.798	2.87227	NA	1.23913
12BQ37-11	483.135	83748.1	2.99121	19.1155	2.43182	0.320517	7.09909	0.044436	6.66958	0.939498	280.271	18.2924	282.3	17.4978			280.271	18.2924	NA	6.52669
12BQ37-60	178.772	23544.8	1.3511	19.4855	4.82274	0.355276	8.24671	0.0502084	6.6895	0.811172	315.801	20.6165	308.682	21.9542			315.801	20.6165	NA	6.52831
12BQ37-13	830.222	194025	3.53013	18.8725	1.07399	0.386493	1.26421	0.0529016	0.666916	0.527535	332.311	2.16008	331.804	3.57829			332.311	2.16008	NA	0.650018
12BQ37-9	142.043	34339.1	1.66306	18.1964	3.82862	0.505765	4.45464	0.0667471	2.27718	0.511192	416.528	9.18515	415.597	15.1938			416.528	9.18515	101.49	2.20517
12BQ37-76	486.255	119978	1.52547	17.8303	0.504486	0.57524	1.79281	0.0743886	1.72036	0.959592	462.541	7.67862	461.398	6.6477			462.541	7.67862	101.504	1.66009
12BQ37-65	233.367	276246	4.24783	13.6728	0.378354	1.71782	1.25551	0.170347	1.19714	0.953512	1014.02	11.2327	1015.21	8.0578	1017.76	7.66343	1017.76	7.66343	99.6322	0.752967
12BQ37-87	186.712	157587	1.54957	13.6589	0.81405	1.71257	2.64441	0.169654	2.516	0.951439	1010.2	23.5254	1013.25	16.9538	1019.82	16.4819	1019.82	16.4819	99.057	1.61616
12BQ37-52	291.827	124076	2.33667	13.5779	0.409334	1.76345	1.98391	0.173658	1.94122	0.978483	1032.24	18.5161	1032.12	12.8554	1031.84	8.2726	1031.84	8.2726	100.038	0.801731
12BQ37-41	231.433	246594	0.767484	13.4449	0.706075	1.85497	1.52725	0.180881	1.35424	0.886715	1071.78	13.3721	1065.2	10.0761	1051.75	14.2466	1051.75	14.2466	101.904	1.35455
12BQ37-98	98.3216	78518.6	147.331	13.4225	1.99857	1.8128	3.36127	0.176474	2.70257	0.804032	1047.68	26.1333	1050.09	21.9995	1055.12	40.2728	1055.12	40.2728	99.2952	3.8169
12BQ37-78	76.3921	53058.5	2.36424	13.3893	2.24261	1.88753	2.922	0.183295	1.87317	0.641059	1084.95	18.7049	1076.71	19.3968	1060.1	45.1562	1060.1	45.1562	102.344	4.25962
12BQ37-25	75.0522	86991.2	2.00271	13.3131	1.39923	1.85995	1.74748	0.179588	1.04683	0.599047	1064.72	10.274	1066.97	11.54	1071.58	28.1228	1071.58	28.1228	99.3603	2.62442
12BQ37-70	178.547	91159.8	3.09581	13.2157	0.662265	1.90635	1.73633	0.182721	1.60506	0.924403	1081.82	15.9852	1083.31	11.5647	1086.31	13.2569	1086.31	13.2569	99.5867	1.22036
12BQ37-66	84.2559	55255.6	2.47087	12.9082	1.51026	2.07791	2.15323	0.194532	1.53477	0.712776	1145.88	16.1123	1141.54	14.7612	1133.34	30.0655	1133.34	30.0655	101.106	2.65283
12BQ37-17	51.3557	34972.8	1.43512	12.6676	1.91105	2.17151	2.36127	0.199505	1.3869	0.587353	1172.66	14.8702	1171.96	16.4176	1170.7	37.8495	1170.7	37.8495	100.168	3.23308
12BQ37-33	82.4071	51730.9	2.22713	12.5998	1.02495	2.15707	2.20604	0.197119	1.95348	0.885514	1159.82	20.7357	1167.33	15.3058	1181.3	20.2699	1181.3	20.2699	98.1817	1.71589
12BQ37-68	344.527	230205	2.56737	12.5532	0.430085	2.26411	1.16543	0.206134	1.08317	0.929416	1208.19	11.9335	1201.18	8.20841	1188.63	8.49296	1188.63	8.49296	101.645	0.714517
12BQ37-80	198.627	44175.7	1.67126	12.5142	0.401908	2.23656	1.40963	0.202994	1.35112	0.958493	1191.38	14.6971	1192.58	9.89112	1194.75	7.92063	1194.75	7.92063	99.7183	0.662954
12BQ37-42	137.204	114798	1.92435	12.2938	1.09113	2.25467	2.6026	0.201033	2.36283	0.907873	1180.87	25.4956	1198.24	18.3088	1229.73	21.4083	1229.73	21.4083	96.0262	1.74089
12BQ37-74	26.3481	29359.8	2.29657	12.2831	5.84086	2.37456	6.38665	0.211539	2.58333	0.40449	1237.01	29.0773	1234.98	45.6627	1231.44	114.701	1231.44	114.701	100.452	9.31432
12BQ37-14	330.906	220120	3.41388	12.15	0.430144	2.48982	2.38617	0.219404	2.34708	0.983618	1278.72	27.2236	1269.08	17.2877	1252.75	8.42908	1252.75	8.42908	102.074	0.672847
12BQ37-36	97.8604	73916.6	1.91665	11.6679	0.78451	2.72435	2.20601	0.230544	2.0618	0.934629	1337.35	24.9014	1335.12	16.3866	1331.53	15.1796	1331.53	15.1796	100.437	1.14001
12BQ37-15	64.1488	49752.6	2.95597	11.2751	1.48806	2.88517	2.3336	0.235933	1.79759	0.770311	1365.52	22.1211	1378.04	17.5979	1397.49	28.529	1397.49	28.529	97.7127	2.04146
12BQ37-27	209.787	162249	2.49354	11.2072	0.419698	3.04102	1.39811	0.247181	1.33363	0.953879	1423.92	17.0388	1417.98	10.6835	1409.05	8.03338	1409.05	8.03338	101.055	0.570127
12BQ37-63	124.012	191264	1.95336	11.1777	0.736511	3.02794	1.54417	0.245471	1.3572	0.878923	1415.08	17.2437	1414.69	11.7871	1414.09	14.0879	1414.09	14.0879	100.07	0.996258
12BQ37-75	182.512	237322	2.92037	11.1734	0.457533	3.04586	3.20327	0.246828	3.17043	0.989747	1422.1	40.4604	1419.2	24.491	1414.83	8.75072	1414.83	8.75072	100.514	0.618502
12BQ37-81	170.453	124342	2.85672	11.141	0.604767	3.08713	1.94507	0.249448	1.84866	0.950435	1435.63	23.7924	1429.5	14.9187	1420.37	11.558	1420.37	11.558	101.074	0.813733
12BQ37-49	183.108	387797	2.60671	11.1049	0.601502	3.08815	1.91482	0.248722	1.81789	0.94938	1431.88	23.3419	1429.75	14.6879	1426.57	11.486	1426.57	11.486	100.372	0.805145
12BQ37-43	210.578	270517	2.05788	11.0628	0.665619	3.05524	1.3961	0.245137	1.22721	0.879027	1413.35	15.575	1421.55	10.6805	1433.83	12.6979	1433.83	12.6979	98.5717	0.885592
12BQ37-61	172.494	187920	1.08524	11.0356	0.469158	3.08797	1.02296	0.247153	0.909036	0.888629	1423.78	11.613	1429.71	7.84629	1438.53	8.94429	1438.53	8.94429	98.9744	0.621765
12BQ37-67	568.683	154108	3.92432	10.8248	0.18623	3.38537	2.46292	0.265781	2.45587	0.997137	1519.35	33.2424	1501.01	19.3078	1475.21	3.53289	1475.21	3.53289	102.992	0.239484
12BQ37-47	291.533	254048	4.44465	10.4567	0.287133	3.34722	2.05382	0.253851	2.03365	0.990179	1458.3	26.5417	1492.14	16.0583	1540.54	5.39995	1540.54	5.39995	94.6617	0.350523
12BQ37-26	363.67	479538	3.01378	10.4234	0.223372	3.37217	1.66654	0.254928	1.6515	0.990977	1463.84	21.627	1497.95	13.0521	1546.54	4.1975	1546.54	4.1975	94.6523	0.271412
12BQ37-57	125.45	223361	2.06912	10.1062	1.64481	3.65714	4.29486	0.268057	3.96741	0.92376	1530.93	54.0661	1562.07	34.2583	1604.39	30.6746	1604.39	30.6746	95.4214	1.91191
12BQ37-30	42.2987	69588.9	1.41836	9.85604	1.36601	4.23529	2.44315	0.30275	2.02559	0.829087	1704.93	30.3456	1680.89	20.0715	1650.99	25.3231	1650.99	25.3231	103.267	1.53381
12BQ37-28	93.4699	113891	0.921185	9.81917	0.835215	4.13023	1.93947	0.294136	1.75041	0.902523	1662.16	25.6466	1660.3	15.8557	1657.94	15.4683	1657.94	15.4683	100.255	0.932984
12BQ37-7	258.367	176471	1.52004	9.79057	0.342222	4.05859	1.22458	0.288192	1.17579	0.960157	1632.49	16.957	1646.03	9.97646	1663.34	6.33253	1663.34	6.33253	98.1455	0.380713
12BQ37-69	285.204	155946	1.18389	9.66878	0.267483	4.25917	1.89179	0.298673	1.87279	0.989954	1684.72	27.7655	1685.51	15.5577	1686.47	4.93631	1686.47	4.93631	99.8964	0.292701
12BQ37-22	136.495	142947	2.37844	9.65831	0.374303	4.30813	1.54675	0.301779	1.50077	0.970278	1700.12	22.4278	1694.92	12.7473	1688.47	6.9059	1688.47	6.9059	100.69	0.409004
12BQ37-4	71.3246	128624	1.11749	9.63822	1.11288	4.25071	1.55036	0.297137	1.07941	0.696229	1677.1	15.9395	1683.87	12.7447	1692.31	20.5216	1692.31	20.5216	99.1011	1.21264
12BQ37-31	195.991	161453	2.72141	9.54083	0.449327	4.44766	1.67474	0.307763	1.61334	0.963337	1729.69	24.4756	1721.26	13.8844	1711.01	8.26485	1711.01	8.26485	101.092	0.483039
12BQ37-6	73.3669	211338	2.51906	9.52504	1.39125	4.45036	1.68577	0.307441	0.95198	0.564713	1728.1	14.4306	1721.77	13.9774	1714.06	25.5852	1714.06	25.5852	100.819	1.49267
12BQ37-44	294.242	22539.7	1.24137	9.46765	0.729761	4.08979	5.36189	0.280829	5.31199	0.990695	1595.54	75.0838	1652.27	43.7741	1725.17	13.4021	1725.17	13.4021	92.486	0.77686
12BQ37-37	139.589	263514	1.68759	9.4054	0.376918	4.51394	1.31547	0.307916	1.26031	0.958072	1730.44	19.1272	1733.54	10.9351	1737.27	6.90978	1737.27	6.90978	99.607	0.397738
12BQ37-10	432.225	28421.8	1.01343	9.14489	0.326542	4.67209	2.3495	0.309877	2.3267	0.990295	1740.1	35.4831	1762.26	19.653	1788.61	5.94983	1788.61	5.94983	97.288	0.332652
12BQ37-94	185.889	128718	1.75175	8.87019	0.579845	5.14151	2.36744	0.330767	2.29533	0.969542	1842.1	36.7781	1842.99	20.1271	1843.99	10.492	1843.99	10.492	99.8978	0.568983
12BQ37-96	115.697	183161	3.05238	8.74743	0.660118	5.39305	1.35427	0.342148	1.1825	0.87316	1896.99	19.4327	1883.75	11.6006	1869.17	11.9104	1869.17	11.9104	101.489	0.637206
12BQ37-72	61.1044	79066	1.27525	7.80647	0.500363	6.67665	1.51	0.378018	1.42469	0.943502	2067.02	25.1941	2069.54	13.3358	2072.03	8.81415	2072.03	8.81415	99.7579	0.425387
12BQ37-18	113.396	390991	1.90038	7.53389	0.520891	6.984	1.91739	0.381612	1.84528	0.962391	2083.81	32.8564	2109.4	17.032	2134.43	9.11386	2134.43	9.11386	97.6285	0.426993
12BQ37-71	90.6648	213177	1.30202	5.28645	0.249422	13.6606	2.14631	0.523761	2.13176	0.993225	2715.11	47.2369	2726.47	20.3094	2734.89	4.10201	2734.89	4.10201	99.2769	0.149988
12BQ37-23	189.055	216924	2.43267	4.46864	0.0958095	18.3975	1.43866	0.596258	1.43547	0.99778	3014.74	34.5658	3010.76	13.8557	3008.09	1.53932	3008.09	1.53932	100.221	0.0511727
12BQ38-87	523.695	6336.19	0.644306	20.0707	8.35222	0.104129	8.78957	0.0151576	2.73806	0.311512	96.9789	2.63546	100.58	8.41701			96.9789	2.63546	NA	2.71756
12BQ38-75	718.096	33660.3	1.63253	20.0365	3.46616	0.104672	3.95688	0.0152107	1.90857	0.482343	97.3161	1.8434	101.08	3.80698			97.3161	1.8434	NA	1.89424
12BQ38-44	514.468	25881.3	1.19487	20.4972	7.84019	0.102544	8.55143	0.0152442	3.41443	0.399282	97.5288	3.30499	99.122	8.07592			97.5288	3.30499	NA	3.38873
12BQ38-11	585.075	64352.8	2.01456	20.7536	3.07377	0.101381	3.5572	0.0152598	1.79043	0.503326	97.6277	1.73479	98.0499	3.32474			97.6277	1.73479	NA	1.77694
12BQ38-10	381.127	27230.2	1.50611	21.5861	4.75731	0.0976817	5.31916	0.0152928	2.37938	0.447323	97.8375	2.31035	94.6341	4.80632			97.8375	2.31035	NA	2.36142
12BQ38-15	406.122	54670.6	2.06439	21.9757	6.47474	0.0962034	6.69317	0.0153332	1.69594	0.253383	98.0938	1.65102	93.2658	5.96439			98.0938	1.65102	NA	1.6831
12BQ38-92	368.37	20658.4	0.933666	20.3583	4.42407	0.104715	5.32716	0.0154614	2.96754	0.557058	98.9078	2.91272	101.119	5.12728			98.9078	2.91272	NA	2.94489
12BQ38-30	926.233	84149.7	0.555493	20.8454	3.17297	0.10344	3.34588	0.0156385	1.06169	0.317312	100.032	1.05383	99.9464	3.18478			100.032	1.05383	NA	1.05349
12BQ38-99	324.949	25552.5	2.58248	22.8042	6.56699	0.0949882	6.67806	0.0157103	1.21287	0.18162	100.488	1.20933	92.1395	5.88228			100.488	1.20933	NA	1.20346
12BQ38-43	53.6673	3893.67	0.333318	41.1124	86.2036	0.0527868	86.4928	0.0157397	7.06607	0.0816955	100.675	7.05848	52.2321	44.0623			100.675	7.05848	NA	7.01118
12BQ38-59	389.08	33965.3	2.2231	21.0982	7.30391	0.104548	7.54591	0.0159977	1.8957	0.251222	102.312	1.92421	100.966	7.25236			102.312	1.92421	NA	1.88073
12BQ38-73	369.401	32939.9	1.82112	21.092	5.6117	0.104764	6.39986	0.0160261	3.07686	0.480769	102.492	3.1286	101.164	6.16237			102.492	3.1286	NA	3.05252
12BQ38-48	48.1118	4026.15	0.499402	21.3511	34.6777	0.104558	35.135	0.0161911	5.65045	0.160821	103.539	5.80367	100.975	33.7831			103.539	5.80367	NA	5.60532
12BQ38-08	344.014	20923.8	2.30003	20.5051	6.8695	0.112873	7.06549	0.0167862	1.6526	0.233898	107.313	1.75877	108.59	7.27654			107.313	1.75877	NA	1.63892
12BQ38-46	326.028	13992.4	1.38898	21.0692	7.57808	0.110808	8.01849	0.0169323	2.62084	0.32685	108.239	2.81309	106.704	8.12199			108.239	2.81309	NA	2.59896
12BQ38-61	274.432	29533.8	0.673929	20.994	4.84729	0.157064	4.99056	0.0239149	1.18721	0.237891	152.351	1.78752	148.13	6.87867			152.351	1.78752	NA	1.17329
12BQ38-36	464.084	36690	1.09054	20.1822	3.11698	0.177155	3.25312	0.0259312	0.931264	0.286268	165.033	1.51738	165.61	4.97113			165.033	1.51738	NA	0.919445
12BQ38-60	479.667	34032.8	1.04876	19.6414	2.44601	0.183919	2.84353	0.0261998	1.45006	0.509952	166.72	2.38655	171.427	4.48533			166.72	2.38655	NA	1.43147
12BQ38-14	535.999	46540.3	0.646399	20.2902	2.21309	0.181629	2.34689	0.0267283	0.78112	0.332831	170.039	1.31085	169.462	3.66294			170.039	1.31085	NA	0.770908
12BQ38-34	267.965	20339.6	1.91309	20.1532	3.91578	0.198367	4.25545	0.0289942	1.66601	0.391499	184.25	3.02617	183.743	7.15257			184.25	3.02617	NA	1.64242
12BQ38-01	210.152	86974	2.03867	20.1764	5.14381	0.198504	5.70048	0.0290476	2.45697	0.431011	184.585	4.47088	183.859	9.58703			184.585	4.47088	NA	2.42213
12BQ38-35	256.83	23500	1.3604	19.5893	3.81435	0.206466	4.10622	0.0293336	1.52045	0.370279	186.376	2.79318	190.583	7.1353			186.376	2.79318	NA	1.49868
12BQ38-77	123.369	23886.3	1.00116	18.9997	8.19536	0.216084	8.47229	0.0297761	2.14842	0.253582	189.147	4.00463	198.645	15.287			189.147	4.00463	NA	2.11721
12BQ38-72	140.775	23640.3	1.17908	21.3885	8.35588	0.192855	8.44378	0.0299165	1.21517	0.143913	190.026	2.27544	179.063	13.8624			190.026	2.27544	NA	1.19744
12BQ38-16	92.1812	22859.5	1.35104	20.2318	8.49615	0.208261	9.57596	0.0305592	4.41752	0.461313	194.047	8.44433	192.092	16.761			194.047	8.44433	NA	4.35169
12BQ38-52	125.061	28708.9	1.06767	19.4939	7.31256	0.217527	7.59289	0.0307546	2.04414	0.269217	195.269	3.93172	199.849	13.7752			195.269	3.93172	NA	2.01349
12BQ38-67	143.419	49056	1.25716	18.9242	8.70354	0.226075	9.17123	0.031029	2.89134	0.315262	196.985	5.60937	206.953	17.1725			196.985	5.60937	NA	2.84762
12BQ38-37	282.603	75581.8	1.83769	19.2523	3.57201	0.230635	4.21097	0.0322038	2.23002	0.529574	204.326	4.48506	210.723	8.01342			204.326	4.48506	NA	2.19505
12BQ38-41	264.532	41428.1	2.18961	19.9637	4.42019	0.226729	4.64487	0.0328283	1.42714	0.30725	208.225	2.92417	207.495	8.71712			208.225	2.92417	NA	1.40433
12BQ38-28	485.033	111686	1.85348	19.6938	1.35365	0.233194	2.10077	0.0333079	1.60651	0.764724	211.218	3.33825	212.832	4.03365			211.218	3.33825	NA	1.58048
12BQ38-18	177.526	27961.1	1.4735	20.5431	5.54297	0.223814	5.63766	0.0333467	1.02889	0.182503	211.46	2.14039	205.079	10.4692			211.46	2.14039	NA	1.0122
12BQ38-91	142.709	30867.4	1.5509	20.0787	6.91715	0.230182	7.43693	0.0335202	2.73148	0.367286	212.543	5.71089	210.349	14.1304			212.543	5.71089	NA	2.68694
12BQ38-51	395.289	83308.8	1.58238	19.8042	3.93812	0.233642	4.24322	0.0335589	1.57992	0.372339	212.784	3.30693	213.201	8.16013			212.784	3.30693	NA	1.55413
12BQ38-20	482.675	21197.9	2.02747	19.1476	3.22396	0.247209	3.90297	0.0343303	2.19983	0.563629	217.593	4.70679	224.306	7.85522			217.593	4.70679	NA	2.16311
12BQ38-58	318.25	51611.1	1.27687	19.7345	4.04222	0.245758	4.21178	0.0351749	1.18302	0.280884	222.855	2.59137	223.125	8.43683			222.855	2.59137	NA	1.16281
12BQ38-56	218.134	49743.7	1.61107	19.7843	2.48015	0.273488	2.89053	0.0392426	1.48459	0.513604	248.137	3.61381	245.478	6.30313			248.137	3.61381	NA	1.45638
12BQ38-21	354.057	116112	2.2959	19.4997	3.09674	0.28708	3.37503	0.0406004	1.34203	0.397634	256.553	3.3754	256.259	7.64387			256.553	3.3754	NA	1.31567
12BQ38-88	118.375	25722.9	1.48539	19.2074	6.99186	0.412289	7.2641	0.057434	1.97002	0.2712	360.001	6.89771	350.522	21.5355			360.001	6.89771	NA	1.91602
12BQ38-06	156.631	71171.6	1.34764	19.0053	2.37565	0.418705	3.3064	0.0577141	2.29969	0.695527	361.709	8.08911	355.124	9.90865			361.709	8.08911	NA	2.23636
12BQ38-74	99.0874	26760.8	3.19587	19.1279	5.6258	0.426273	5.83475	0.0591363	1.54746	0.265215	370.37	5.56981	360.527	17.7085			370.37	5.56981	NA	1.50385
12BQ38-63	212.814	92298.1	0.932538	18.2335	1.86562	0.490933	2.12672	0.0649221	1.02099	0.480079	405.49	4.01251	405.546	7.1107			405.49	4.01251	99.912	0.989547
12BQ38-86	147.463	15736.5	6.5901	18.235	2.62354	0.494481	3.073	0.0653966	1.60012	0.520702	408.362	6.33161	407.96	10.3244			408.362	6.33161	100.666	1.55049
12BQ38-45	243.958	100249	3.05077	17.8796	1.27575	0.524778	3.4066	0.0680508	3.1587	0.927229	424.401	12.9738	428.338	11.9053			424.401	12.9738	94.4055	3.05697
12BQ38-32	59.0911	23299.3	1.31215	17.049	7.60035	0.692213	8.1879	0.0855928	3.04572	0.371978	529.42	15.4803	534.129	34.0212	554.3	166.042	529.42	15.4803	95.5115	2.92401
12BQ38-04	72.8082	49694.5	0.581747	17.2807	4.18577	0.706966	5.04388	0.0886051	2.81426	0.557956	547.282	14.7663	542.943	21.2144	524.749	91.8213	547.282	14.7663	104.294	2.69812
12BQ38-03	98.9282	63810	1.55236	16.7584	2.9084	0.814198	3.67969	0.0989606	2.25418	0.6126	608.314	13.0854	604.806	16.7697	591.668	63.0688	608.314	13.0854	102.814	2.15109
12BQ38-55	37.6171	28815.5	0.904524	13.9366	3.35302	1.54321	3.65495	0.155984	1.45461	0.397984	934.42	12.653	947.784	22.5229	978.936	68.3509	978.936	68.3509	95.4527	6.98216
12BQ38-69	83.1347	79594.4	2.93437	13.7248	1.31117	1.7114	1.84687	0.170356	1.30067	0.704258	1014.07	12.2047	1012.81	11.837	1010.06	26.5689	1010.06	26.5689	100.398	2.63044
12BQ38-05	317.098	78844.4	1.63223	13.7114	0.738517	1.67149	1.45241	0.16622	1.25064	0.861076	991.251	11.4909	997.753	9.22747	1012.05	14.9704	1012.05	14.9704	97.9448	1.47921
12BQ38-82	106.436	102285	1.11293	13.675	1.33316	1.78671	1.57884	0.177207	0.845829	0.535729	1051.7	8.20783	1040.63	10.2789	1017.43	26.984	1017.43	26.984	103.368	2.65216
12BQ38-95	50.4164	38725	2.58986	13.6165	2.80689	1.84062	3.52046	0.181773	2.12486	0.603574	1076.65	21.069	1060.08	23.1663	1026.11	56.7762	1026.11	56.7762	104.926	5.53315
12BQ38-80	75.6159	62320.2	1.44554	13.5771	1.54143	1.79503	2.59735	0.176758	2.0905	0.804861	1049.24	20.2424	1043.66	16.9389	1031.97	31.1735	1031.97	31.1735	101.673	3.02077
12BQ38-96	129.653	99254.1	2.1009	13.4711	0.798217	1.78925	1.18818	0.174812	0.880125	0.740734	1038.57	8.4424	1041.55	7.73934	1047.83	16.1132	1047.83	16.1132	99.1162	1.53777
12BQ38-23	148.82	126204	1.65421	13.2726	0.958127	1.78008	2.57959	0.171353	2.39506	0.928463	1019.56	22.5861	1038.21	16.7727	1077.69	19.2309	1077.69	19.2309	94.606	1.78445
12BQ38-90	56.047	26571.7	2.6577	13.2512	2.59358	1.88104	2.8493	0.18078	1.17977	0.414056	1071.23	11.6439	1074.43	18.8915	1080.91	52.0484	1080.91	52.0484	99.1047	4.81523
12BQ38-07	15.0304	17688.7	1.79706	13.1474	6.61174	1.83684	6.97706	0.17515	2.22807	0.319342	1040.42	21.4075	1058.73	45.9023	1096.67	132.479	1096.67	132.479	94.8712	12.0801
12BQ38-66	20.424	26771.9	1.48319	13.0197	3.95956	2.03153	4.28329	0.191833	1.63354	0.381376	1131.3	16.9496	1126.13	29.1533	1116.19	79.05	1116.19	79.05	101.354	7.08213
12BQ38-22	193.801	181107	0.927471	12.8323	0.596033	2.04409	1.08832	0.19024	0.91059	0.836697	1122.68	9.3823	1130.33	7.42053	1145.07	11.8378	1145.07	11.8378	98.0445	1.03381
12BQ38-79	220.801	214542	1.69037	12.8133	0.749709	2.09378	1.82051	0.194577	1.65898	0.911269	1146.12	17.4195	1146.77	12.5109	1147.98	14.8897	1147.98	14.8897	99.8386	1.29704
12BQ38-26	122.63	140946	1.83477	12.7618	0.724158	2.13677	3.24442	0.197774	3.16257	0.974772	1163.35	33.6632	1160.78	22.4446	1155.96	14.3492	1155.96	14.3492	100.639	1.24132
12BQ38-12	76.9253	111312	3.02302	12.7487	0.72964	2.12906	1.47183	0.196858	1.27825	0.868474	1158.42	13.5533	1158.28	10.169	1158	14.486	1158	14.486	100.036	1.25095
12BQ38-17	193.036	132421	1.62637	12.7485	0.632787	2.06533	1.78423	0.190963	1.66826	0.934997	1126.59	17.2438	1137.39	12.2072	1158.03	12.5507	1158.03	12.5507	97.285	1.0838
12BQ38-09	98.1464	48598	1.21054	12.699	1.65168	2.12374	2.37222	0.1956	1.70276	0.717792	1151.64	17.958	1156.55	16.3776	1165.75	32.7295	1165.75	32.7295	98.7897	2.80759
12BQ38-25	132.447	135902	2.18734	12.6907	1.19676	2.09075	1.49124	0.192436	0.88969	0.596613	1134.56	9.25567	1145.77	10.243	1167.05	23.7167	1167.05	23.7167	97.2159	2.03219
12BQ38-62	114.076	152572	2.14782	12.6594	1.32095	2.1626	2.02943	0.198558	1.54068	0.759167	1167.57	16.4535	1169.11	14.0917	1171.97	26.1452	1171.97	26.1452	99.6246	2.23088
12BQ38-70	84.9293	117025	1.907	12.6347	0.737761	2.11705	1.91258	0.193997	1.76456	0.922607	1142.99	18.482	1154.38	13.1905	1175.83	14.6121	1175.83	14.6121	97.207	1.2427
12BQ38-50	108.375	204711	2.50445	12.0791	0.971181	2.43444	1.66051	0.21327	1.34689	0.811128	1246.22	15.2624	1252.83	11.9519	1264.22	18.9701	1264.22	18.9701	98.5761	1.50054
12BQ38-27	97.4005	117043	1.3375	11.3495	0.671688	2.93038	1.71985	0.241212	1.58326	0.920582	1392.99	19.8347	1389.79	13.0207	1384.87	12.8992	1384.87	12.8992	100.587	0.931441
12BQ38-33	115.587	135751	1.72816	11.2357	0.630903	2.89248	2.29744	0.235706	2.20911	0.961555	1364.33	27.164	1379.95	17.3364	1404.18	12.0841	1404.18	12.0841	97.1622	0.86058
12BQ38-31	294.427	530538	2.49943	11.161	0.398146	3.01624	2.62677	0.244156	2.59642	0.988446	1408.27	32.8465	1411.73	20.0334	1416.95	7.61268	1416.95	7.61268	99.3875	0.537259
12BQ38-81	142.809	397748	0.795367	11.1598	0.441829	3.10569	1.64602	0.251371	1.58561	0.963301	1445.54	20.5327	1434.1	12.6433	1417.15	8.44769	1417.15	8.44769	102.003	0.596104
12BQ38-54	105.937	122313	2.33625	11.1371	0.720119	3.08862	1.48808	0.249479	1.30223	0.875109	1435.79	16.7615	1429.87	11.4146	1421.05	13.7614	1421.05	13.7614	101.037	0.968394
12BQ38-24	104.389	128778	2.52877	11.1018	0.798139	3.05328	1.16835	0.245842	0.853241	0.730295	1417	10.8538	1421.05	8.93664	1427.12	15.2398	1427.12	15.2398	99.2906	1.06787
12BQ38-83	469.694	83647.7	1.73691	11.0511	0.203126	2.94129	1.99635	0.235745	1.98599	0.99481	1364.54	24.4237	1392.61	15.1286	1435.84	3.87389	1435.84	3.87389	95.034	0.269799
12BQ38-98	324.382	671643	1.50832	10.7214	3.82525	3.06967	4.36873	0.238693	2.11028	0.483043	1379.9	26.2143	1425.15	33.4715	1493.39	72.4153	1493.39	72.4153	92.4003	4.84904
12BQ38-64	262.222	240930	1.18067	9.89817	0.378206	3.99016	1.24323	0.286447	1.18431	0.952604	1623.75	16.9995	1632.2	10.0942	1643.08	7.01843	1643.08	7.01843	98.8234	0.42715
12BQ38-39	68.9038	76347.4	0.939378	9.68139	1.11778	4.31896	3.02369	0.30326	2.8095	0.929162	1707.46	42.1442	1696.99	24.9349	1684.06	20.6334	1684.06	20.6334	101.389	1.22522
12BQ38-40	65.1422	83939.8	1.45545	9.6769	1.34905	4.31483	2.98629	0.30283	2.6642	0.892145	1705.32	39.921	1696.2	24.6219	1684.92	24.899	1684.92	24.899	101.211	1.47775
12BQ38-78	155.64	182217	3.129	9.59868	0.445603	4.47225	1.4282	0.311341	1.35691	0.950081	1747.3	20.7678	1725.84	11.8522	1699.89	8.2078	1699.89	8.2078	102.789	0.482843
12BQ38-49	842.604	222553	2.2361	9.58583	0.245465	4.18295	2.33266	0.290811	2.31971	0.994448	1645.58	33.6903	1670.69	19.1178	1702.35	4.51915	1702.35	4.51915	96.6651	0.265464
12BQ38-100	347.131	303554	1.27249	9.5602	0.430175	4.18724	1.36349	0.290331	1.29385	0.948927	1643.18	18.7671	1671.53	11.1761	1707.28	7.91619	1707.28	7.91619	96.2457	0.463673
12BQ38-93	79.3614	130052	1.90038	9.51566	0.46044	4.4948	2.15644	0.310204	2.10671	0.976939	1741.71	32.1541	1730.01	17.9131	1715.87	8.46585	1715.87	8.46585	101.506	0.493385
12BQ38-57	321.11	76481.1	1.86373	8.80479	0.539322	5.10077	1.89779	0.325727	1.81954	0.95877	1817.64	28.8192	1836.23	16.1126	1857.36	9.74284	1857.36	9.74284	97.8611	0.524552
12BQ38-02	20.5925	57686.1	0.973737	6.4746	0.870406	9.43307	3.60581	0.44296	3.49918	0.970428	2363.88	69.2487	2381.05	33.1152	2395.77	14.8066	2395.77	14.8066	98.669	0.618032
12BQ38-53	83.9494	913654	0.948893	6.11791	0.31394	10.6067	1.39369	0.470632	1.35787	0.974299	2486.33	28.0128	2489.29	12.9327	2491.7	5.28962	2491.7	5.28962	99.7846	0.21229
12BQ38-85	24.3306	11679.7	0.529557	5.03582	1.2475	14.9287	1.67435	0.545242	1.11677	0.66699	2805.36	25.4026	2810.7	15.935	2814.53	20.3819	2814.53	20.3819	99.674	0.724166
Notes for analyses:
Best age is determined from 206Pb/238U age for analyses with 206Pb/238U age < ~1000 Ma and from 206Pb/207Pb age for analyses with 206Pb/238Uage > ~1000 Ma.
Concordance is based on 206Pb/238U age / 206Pb/207Pb age, with 100% = concordant. Value is not reported for 206Pb/238U ages <500 Ma because of large uncertainty in 206Pb/207Pb age.
All uncertainties are reported at the 1-sigma level, and include only measurement errors.
Systematic errors are shown as 206Pb/238U uncertainty, 206Pb/207Pb uncertainty to the right of each sample (in %, at 2-sigma level).
U concentration and U/Th are calibrated relative to Sri Lanka zircon and are accurate to ~20%.
Common Pb correction is from 204Pb, with composition interpreted from Stacey and Kramers (1975).
Uncertainties of 1.5 for 206Pb/ 204Pb, 0.3 for 207Pb/ 204Pb, and 2.0 for 208Pb/ 204Pb are applied to common Pb composition.
U/Pb and 206Pb/207Pb fractionation is calibrated relative to fragments of a large Sri Lanka zircon of 563.5 ± 3.2 Ma (2-sigma).
U decay constants and composition as follows: 238U = 9.8485 x 10-10, 235U = 1.55125 x 10-10, 238U/235U = 137.88
Analytical methods as described by Gehrels et al. (2008).
Gehrels, G.E., Valencia, V.A., Ruiz, J., 2008. Enhanced precision, accuracy, efficiency, and spatial resolution of U-Pb ages by laser ablation-multicollector-inductively coupled plasma mass spectrometry:
Geochemistry Geophysics Geosystems 9 (Q03017), 13.
Stacey, J.S., and Kramers, J.D., 1975, Approximation of terrestrial lead isotopic evolution by a two-stage model: Earth and Planetary Science Letters, v. 26, p. 207-221.
